# Supplementary material for: Modular access to furo[3,2-c]chromen-4-ones via Yb(OTf)3-catalyzed [3 + 2] annulation of 4-hydroxycoumarins with β-nitroalkenes
Source: Royal Society of Chemistry journal article supplement (doi:10.1039/d4ra03962a), 2024-01-01

## Electronic Supplementary Information

### Modular access to furo[3,2-*c*]chromen-4-ones via Yb(OTf)<sub>3</sub>-catalyzed [3 + 2] annulation of 4-hydroxycoumarins with $\beta$ -nitroalkenes

Hua Wang,<sup>\*a</sup> Qin Ma,<sup>b</sup> Yifei Xu,<sup>a</sup> Yanyan Sun,<sup>a</sup> Siyuan Zhao,<sup>a</sup> Shaoyin Wang,<sup>\*b</sup> and Xinwei He<sup>\*a</sup>

*<sup>a</sup>Key Laboratory of Functional Molecular Solids, Ministry of Education, Anhui Laboratory of Molecule-Based Materials (State Key Laboratory Cultivation Base), College of Chemistry and Materials Science, Anhui Normal University, Wuhu 241002, P.R. China.*

*<sup>b</sup>Department of Chemistry, Wannan Medical College, Wuhu 241002, P.R. China.*

#### Table of contents

|                                                                                                         |     |
|---------------------------------------------------------------------------------------------------------|-----|
| 1. General comments-----                                                                                | S2  |
| 2. General procedure for the synthesis of furo[3,2- <i>c</i> ]chromen-4-ones <b>3</b> or <b>5</b> ----- | S2  |
| 3. Characterization data for all compounds-----                                                         | S2  |
| 4. X-ray crystallographic data of compound <b>5d</b> -----                                              | S9  |
| 5. <sup>1</sup> H, <sup>13</sup> C NMR spectra for all compounds-----                                   | S10 |

## 1. General comments

General comments. Unless otherwise noted, all commercially available reagents and solvents were used without further purification unless noted otherwise. The  $\beta$ -nitroalkenes **2** were prepared from benzaldehyde and nitroalkanes.<sup>1</sup> Infrared spectra were obtained on a FTIR spectrometer. <sup>1</sup>H NMR spectra were recorded on 400 MHz or 500MHz spectrometer in CDCl<sub>3</sub> solution and the chemical shifts were reported relative to internal standard TMS (0 ppm). The following abbreviations are used to describe peak patterns where appropriate: br = broad, s = singlet, d = doublet, t = triplet, q = quartet, m = multiplet. Coupling constants are reported in Hertz (Hz). <sup>13</sup>C NMR were recorded on 100 MHz or 125 MHz and referenced to the internal solvent signals (central peak is 77.00 ppm in CDCl<sub>3</sub>). HRMS analysis with a quadrupole time-of-flight mass spectrometer yielded ion mass/charge ( $m/z$ ) ratios in atomic mass units. Melting points were measured with micro melting point apparatus.

## 2. General procedure for the synthesis of furo[3,2-*c*]chromen-4-ones **3** and **5**.

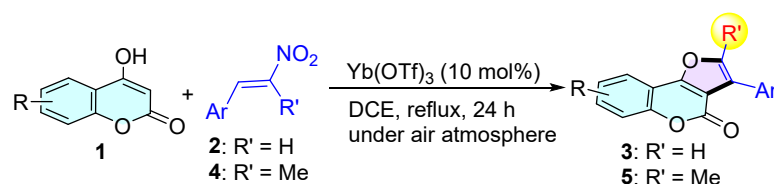

A solution of 4-hydroxycoumarin **1** (0.5 mmol),  $\beta$ -nitrostyrenes **2** (0.5 mmol) or  $\beta$ -2-nitrophenylpropenes **4** (0.5 mmol), and Yb(OTf)<sub>3</sub> (0.05 mmol) in 1,2-DCE (5 mL) was stirred under air atmosphere at reflux for 24 h. After being cooled down to room temperature, the mixture was diluted with ethyl acetate (50 mL), washed with saturated NaCl solution (10 mL) and dried over anhydrous Na<sub>2</sub>SO<sub>4</sub>. The solvent was evaporated and the residue was purified by silica gel column chromatography with petroleum ether/ethyl acetate (1:10, v/v) to afford the desired product **3** or **5**.

## 3. Characterization data for all compounds

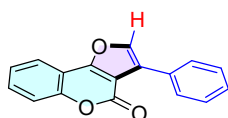

**3-Phenyl-4H-furo[3,2-*c*]chromen-4-one (3a).**<sup>2</sup> White solid (81 mg, 62% vs 79% as previous reported); m.p. 173-174 °C; <sup>1</sup>H NMR (400 MHz, CDCl<sub>3</sub>)  $\delta$  7.89 (dd,  $J$  = 7.8, 1.0 Hz, 1H), 7.81 – 7.71 (m, 3H), 7.56 – 7.49 (m, 1H), 7.49 – 7.42 (m, 3H), 7.41 – 7.31 (m, 2H); <sup>13</sup>C NMR (100 MHz, CDCl<sub>3</sub>)  $\delta$  158.71, 157.77, 152.52, 141.18, 130.88, 129.00, 128.59, 128.50, 128.31, 126.64, 124.42, 120.90, 117.05, 112.68, 108.39; IR (KBr)  $\nu$  3157, 3053, 1740, 1497, 755, 696 cm<sup>-1</sup>; HRMS (ESI):  $m/z$  calcd. for [(C<sub>17</sub>H<sub>10</sub>O<sub>3</sub>+H)<sup>+</sup>]: 263.0703; found: 263.0704.

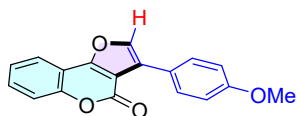

**3-(4-Methoxyphenyl)-4H-furo[3,2-*c*]chromen-4-one (3b).**<sup>2</sup> White solid (95 mg, 65% vs 54% as previous reported); m.p. 189-190 °C; <sup>1</sup>H NMR (400 MHz, CDCl<sub>3</sub>)  $\delta$  7.92 (d,  $J$  = 7.5 Hz, 1H), 7.72 (d,  $J$  = 8.7 Hz, 2H), 7.50 (t,  $J$  = 7.4 Hz, 1H), 7.43 (d,  $J$  = 8.1 Hz, 1H), 7.36 (t,

$J = 7.4$  Hz, 1H), 7.12 – 6.88 (m, 3H), 3.87 (s, 3H);  $^{13}\text{C}$  NMR (100 MHz,  $\text{CDCl}_3$ )  $\delta$  160.30, 158.34, 156.70, 156.31, 152.36, 130.27, 126.06, 124.48, 121.70, 120.59, 117.27, 114.40, 112.76, 112.52, 100.85, 55.37; IR (KBr)  $\nu$  3080, 2843, 1746, 1505, 1264, 1178, 748  $\text{cm}^{-1}$ ; HRMS (ESI):  $m/z$  calcd. for  $([\text{C}_{18}\text{H}_{12}\text{O}_4+\text{H}]^+)$ : 293.0808; found: 293.0809.

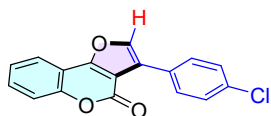

**3-(4-Chlorophenyl)-4H-furo[3,2-c]chromen-4-one (3c).**<sup>2</sup> White solid (89 mg, 60% vs 88% as previous reported); m.p. 188-189 °C;  $^1\text{H}$  NMR (500 MHz,  $\text{CDCl}_3$ )  $\delta$  7.92 (d,  $J = 7.3$  Hz, 1H), 7.77 (s, 1H), 7.71 (d,  $J = 8.5$  Hz, 2H), 7.55 (t,  $J = 7.3$  Hz, 1H), 7.46 (d,  $J = 8.3$  Hz, 1H), 7.42 (d,  $J = 8.5$  Hz, 2H), 7.38 (t,  $J = 7.4$  Hz, 1H);  $^{13}\text{C}$  NMR (100 MHz,  $\text{CDCl}_3$ )  $\delta$  158.92, 157.82, 152.58, 141.22, 134.36, 131.10, 129.92, 128.75, 127.50, 125.66, 124.56, 120.99, 117.14, 112.61, 108.25; IR (KBr)  $\nu$  3439, 1746, 1632, 1092, 1328, 971, 752  $\text{cm}^{-1}$ ; HRMS (ESI):  $m/z$  calcd. for  $([\text{C}_{17}\text{H}_9\text{ClO}_3+\text{H}]^+)$ : 297.0313; found: 297.0314.

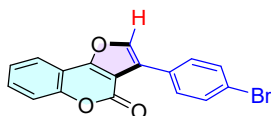

**3-(4-Bromophenyl)-4H-furo[3,2-c]chromen-4-one (3d).**<sup>2</sup> Brown solid (106 mg, 62% vs 84% as previous reported); m.p. 192-193 °C;  $^1\text{H}$  NMR (500 MHz,  $\text{CDCl}_3$ )  $\delta$  7.90 (dd,  $J = 8.0$ , 0.9 Hz, 1H), 7.77 (s, 1H), 7.65 (d,  $J = 8.4$  Hz, 2H), 7.60 – 7.51 (m, 3H), 7.45 (d,  $J = 8.3$  Hz, 1H), 7.37 (t,  $J = 7.5$  Hz, 1H);  $^{13}\text{C}$  NMR (100 MHz,  $\text{CDCl}_3$ )  $\delta$  158.93, 157.79, 152.57, 141.20, 131.70, 131.11, 130.19, 127.97, 125.69, 124.56, 122.58, 120.98, 117.13, 112.58, 108.19; IR (KBr)  $\nu$  3055, 1746, 1484, 1105, 970, 750  $\text{cm}^{-1}$ ; HRMS (ESI):  $m/z$  calcd. for  $([\text{C}_{17}\text{H}_9\text{BrO}_3+\text{H}]^+)$ : 340.9808; found: 340.9810.

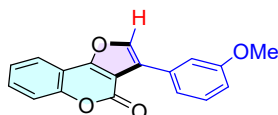

**3-(3-Methoxyphenyl)-4H-furo[3,2-c]chromen-4-one (3e).**<sup>2</sup> White solid (73 mg, 50% vs 53% as previous reported); m.p. 189-190 °C;  $^1\text{H}$  NMR (400 MHz,  $\text{CDCl}_3$ )  $\delta$  7.89 (d,  $J = 7.8$  Hz, 1H), 7.77 (s, 1H), 7.56 – 7.48 (m, 1H), 7.47 – 7.39 (m, 2H), 7.38 – 7.28 (m, 3H), 6.97 – 6.88 (m, 1H), 3.87 (s, 3H);  $^{13}\text{C}$  NMR (100 MHz,  $\text{CDCl}_3$ )  $\delta$  159.57, 158.75, 157.75, 152.53, 141.32, 130.90, 130.26, 129.47, 126.54, 124.42, 120.91, 120.71, 117.03, 114.24, 114.13, 112.67, 108.37, 55.29; IR (KBr)  $\nu$  3127, 3000, 1747, 1499, 1026, 754, 700  $\text{cm}^{-1}$ ; HRMS (ESI):  $m/z$  calcd. for  $([\text{C}_{18}\text{H}_{12}\text{O}_4+\text{H}]^+)$ : 293.0808; found: 293.0809.

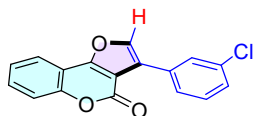

**3-(3-Chlorophenyl)-4H-furo[3,2-c]chromen-4-one (3f).**<sup>3</sup> White solid (83 mg, 56% vs 69% as previous reported); m.p. 177-178 °C;  $^1\text{H}$  NMR (400 MHz,  $\text{CDCl}_3$ )  $\delta$  7.91 (dd,  $J = 7.8$ , 1.4 Hz, 1H), 7.78 (s, 1H), 7.76 – 7.66 (m, 2H), 7.60 – 7.51 (m, 1H), 7.46 (d,  $J = 7.8$  Hz, 1H), 7.43 – 7.32 (m, 3H);  $^{13}\text{C}$  NMR (100 MHz,  $\text{CDCl}_3$ )  $\delta$  158.92, 157.67, 152.60, 141.55, 134.32, 131.13, 130.81, 129.80, 128.40, 128.38, 126.99, 125.51, 124.56, 120.99, 117.15, 112.57, 108.20; IR (KBr)  $\nu$  3149, 1736, 1628, 1497, 983, 750  $\text{cm}^{-1}$ ; HRMS (ESI):  $m/z$  calcd. for  $([\text{C}_{17}\text{H}_9\text{ClO}_3+\text{H}]^+)$ : 297.0313; found: 297.0314.

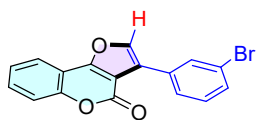

**3-(3-Bromophenyl)-4H-furo[3,2-c]chromen-4-one (3g).**<sup>3</sup> Brown solid (85 mg, 50% vs 66% as previous reported); m.p. 195-196 °C; <sup>1</sup>H NMR (400 MHz, CDCl<sub>3</sub>) δ 7.96 – 7.85 (m, 2H), 7.82 – 7.73 (m, 2H), 7.59 – 7.44 (m, 3H), 7.41 – 7.30 (m, 2H); <sup>13</sup>C NMR (100 MHz, CDCl<sub>3</sub>) δ 158.96, 157.68, 152.66, 141.56, 131.33, 131.25, 131.16, 131.13, 130.09, 127.53, 125.45, 124.57, 122.47, 121.02, 117.19, 112.61, 108.25; IR (KBr) ν 3066, 1735, 1496, 1323, 1049, 760 cm<sup>-1</sup>; HRMS (ESI): *m/z* calcd. for ([C<sub>17</sub>H<sub>9</sub>BrO<sub>3</sub>+H]<sup>+</sup>): 340.9808; found: 340.9809.

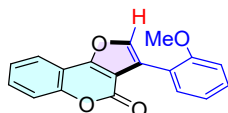

**3-(2-Methoxyphenyl)-4H-furo[3,2-c]chromen-4-one (3h).**<sup>4</sup> White solid (66 mg, 45% vs 28% as previous reported); m.p. 133-134 °C; <sup>1</sup>H NMR (400 MHz, CDCl<sub>3</sub>) δ 7.91 (dd, *J* = 7.8, 1.4 Hz, 1H), 7.83 (s, 1H), 7.62 (dd, *J* = 7.5, 1.6 Hz, 1H), 7.56 – 7.48 (m, 1H), 7.47 – 7.30 (m, 3H), 7.11 – 6.97 (m, 2H), 3.86 (s, 3H); <sup>13</sup>C NMR (100 MHz, CDCl<sub>3</sub>) δ 157.77, 157.57, 157.06, 152.53, 142.89, 131.39, 130.58, 129.75, 124.29, 121.73, 120.83, 120.45, 118.06, 117.02, 112.93, 110.88, 109.64, 55.57; IR (KBr) ν 3160, 2837, 1747, 1499, 1328, 1129, 743 cm<sup>-1</sup>; HRMS (ESI): *m/z* calcd. for ([C<sub>18</sub>H<sub>12</sub>O<sub>4</sub>+H]<sup>+</sup>): 293.0808; found: 293.0810.

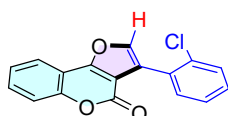

**3-(2-Chlorophenyl)-4H-furo[3,2-c]chromen-4-one (3i).** White solid (67 mg, 45%); m.p. 196-197 °C; <sup>1</sup>H NMR (400 MHz, CDCl<sub>3</sub>) δ 7.93 (dd, *J* = 7.8, 1.3 Hz, 1H), 7.78 (s, 1H), 7.59 – 7.48 (m, 3H), 7.45 (d, *J* = 8.2 Hz, 1H), 7.42 – 7.31 (m, 3H); <sup>13</sup>C NMR (100 MHz, CDCl<sub>3</sub>) δ 157.88, 157.31, 152.68, 142.97, 133.77, 132.08, 130.91, 129.79, 129.76, 128.08, 126.59, 124.46, 122.73, 120.91, 117.21, 112.77, 109.62; IR (KBr) ν 3129, 1740, 1508, 1039, 755 cm<sup>-1</sup>; HRMS (ESI): *m/z* calcd. for ([C<sub>17</sub>H<sub>9</sub>ClO<sub>3</sub>+H]<sup>+</sup>): 297.0313; found: 297.0314.

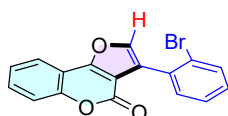

**3-(2-Bromophenyl)-4H-furo[3,2-c]chromen-4-one (3j).** White solid (94 mg, 55%); m.p. 197-198 °C; <sup>1</sup>H NMR (400 MHz, CDCl<sub>3</sub>) δ 7.92 (d, *J* = 7.8 Hz, 1H), 7.75 (s, 1H), 7.70 (d, *J* = 8.0 Hz, 1H), 7.59 – 7.50 (m, 1H), 7.50 – 7.42 (m, 2H), 7.38 (q, *J* = 7.7 Hz, 2H), 7.32 – 7.22 (m, 1H); <sup>13</sup>C NMR (100 MHz, CDCl<sub>3</sub>) δ 157.74, 157.23, 152.68, 142.81, 132.97, 132.02, 130.89, 130.15, 129.96, 127.15, 124.45, 123.99, 120.91, 117.21, 112.78, 109.63; IR (KBr) ν 3128, 1741, 1497, 1036, 930, 754 cm<sup>-1</sup>; HRMS (ESI): *m/z* calcd. for ([C<sub>17</sub>H<sub>9</sub>BrO<sub>3</sub>+H]<sup>+</sup>): 340.9808; found: 340.9809.

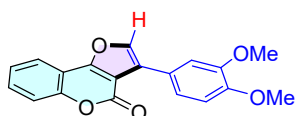

**3-(3,4-Dimethoxyphenyl)-4H-furo[3,2-c]chromen-4-one (3k).** White solid (108 mg, 67%); m.p. 229-230 °C; <sup>1</sup>H NMR (500 MHz, CDCl<sub>3</sub>) δ 7.94 (d, *J* = 7.7 Hz, 1H), 7.51 (t, *J* = 7.4 Hz, 1H), 7.44 (d, *J* = 8.2 Hz, 1H), 7.41 – 7.33 (m, 2H), 7.25 (d, *J* = 1.5 Hz, 1H), 7.04 (s,

1H), 6.95 (d,  $J = 8.4$  Hz, 1H), 3.99 (s, 3H), 3.95 (s, 3H);  $^{13}\text{C}$  NMR (125 MHz,  $\text{CDCl}_3$ )  $\delta$  158.25, 156.63, 156.36, 152.40, 149.97, 149.27, 130.32, 124.46, 121.87, 120.62, 117.68, 117.30, 112.71, 112.54, 111.35, 107.50, 101.23, 56.00, 55.97; IR (KBr)  $\nu$  3112, 2991, 2827, 1747, 1508, 1139, 745  $\text{cm}^{-1}$ ; HRMS (ESI):  $m/z$  calcd. for  $([\text{C}_{19}\text{H}_{14}\text{O}_5+\text{H}]^+)$ : 323.0914; found: 323.0915.

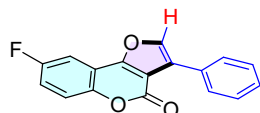

**8-Fluoro-3-phenyl-4H-furo[3,2-c]chromen-4-one (3l).** White solid (85 mg, 61%); m.p. 190-191  $^{\circ}\text{C}$ ;  $^1\text{H}$  NMR (400 MHz,  $\text{CDCl}_3$ )  $\delta$  7.79 (s, 1H), 7.77 – 7.72 (m, 2H), 7.58 (dd,  $J = 7.7, 2.9$  Hz, 1H), 7.51 – 7.37 (m, 4H), 7.30 – 7.21 (m, 1H);  $^{13}\text{C}$  NMR (100 MHz,  $\text{CDCl}_3$ )  $\delta$  158.93 (d,  $J_{\text{C-F}} = 243.4$  Hz), 157.88 (d,  $J_{\text{C-F}} = 2.8$  Hz), 157.40, 148.72 (d,  $J_{\text{C-F}} = 2.1$  Hz), 141.71, 128.76, 128.63 (d,  $J_{\text{C-F}} = 8.7$  Hz), 128.50, 126.94, 118.93, 118.85, 118.26 (d,  $J_{\text{C-F}} = 24.4$  Hz), 113.54, 113.44, 109.17, 106.80 (d,  $J_{\text{C-F}} = 25.7$  Hz); IR (KBr)  $\nu$  3433, 2868, 1739, 1513, 1072, 755  $\text{cm}^{-1}$ ; HRMS (ESI):  $m/z$  calcd. for  $([\text{C}_{17}\text{H}_9\text{FO}_3+\text{H}]^+)$ : 281.0608; found: 281.0606.

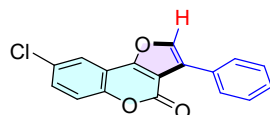

**8-Chloro-3-phenyl-4H-furo[3,2-c]chromen-4-one (3m).**<sup>5</sup> Yellow solid (83 mg, 56% vs 54% as previous reported); m.p. 181-182  $^{\circ}\text{C}$ ;  $^1\text{H}$  NMR (400 MHz,  $\text{CDCl}_3$ )  $\delta$  7.86 (d,  $J = 2.3$  Hz, 1H), 7.77 (s, 1H), 7.73 (d,  $J = 7.4$  Hz, 2H), 7.51 – 7.42 (m, 3H), 7.39 (t,  $J = 8.3$  Hz, 2H);  $^{13}\text{C}$  NMR (100 MHz,  $\text{CDCl}_3$ )  $\delta$  157.41, 157.15, 150.85, 141.74, 130.87, 129.99, 128.67, 128.62, 128.56, 128.49, 126.89, 120.45, 118.56, 113.77, 109.14; IR (KBr)  $\nu$  3446, 2879, 1746, 1502, 1071, 746  $\text{cm}^{-1}$ ; HRMS (ESI):  $m/z$  calcd. for  $([\text{C}_{17}\text{H}_9\text{ClO}_3+\text{H}]^+)$ : 297.0313; found: 297.0316.

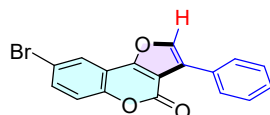

**8-Bromo-3-phenyl-4H-furo[3,2-c]chromen-4-one (3n).**<sup>5</sup> Yellow solid (75 mg, 44% vs 71% as previous reported); m.p. 187-188  $^{\circ}\text{C}$ ;  $^1\text{H}$  NMR (400 MHz,  $\text{CDCl}_3$ )  $\delta$  8.03 (d,  $J = 2.3$  Hz, 1H), 7.78 (s, 1H), 7.77 – 7.71 (m, 2H), 7.62 (dd,  $J = 8.8, 2.3$  Hz, 1H), 7.50 – 7.37 (m, 3H), 7.33 (d,  $J = 8.8$  Hz, 1H);  $^{13}\text{C}$  NMR (101 MHz,  $\text{CDCl}_3$ )  $\delta$  157.30, 157.12, 151.35, 141.76, 133.71, 128.69, 128.65, 128.59, 128.52, 126.93, 123.51, 118.87, 117.28, 114.28, 109.17; IR (KBr)  $\nu$  3442, 2985, 1746, 1502, 1157, 746  $\text{cm}^{-1}$ ; HRMS (ESI):  $m/z$  calcd. for  $([\text{C}_{17}\text{H}_9\text{BrO}_3+\text{H}]^+)$ : 340.9808; found: 340.9810.

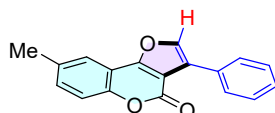

**8-Methyl-3-phenyl-4H-furo[3,2-c]chromen-4-one (3o).**<sup>5</sup> White solid (94 mg, 68% vs 72% as previous reported); m.p. 202-203  $^{\circ}\text{C}$ ;  $^1\text{H}$  NMR (400 MHz,  $\text{CDCl}_3$ )  $\delta$  7.80 – 7.71 (m, 3H), 7.70 – 7.65 (m, 1H), 7.45 (t,  $J = 7.4$  Hz, 2H), 7.38 (t,  $J = 7.3$  Hz, 1H), 7.33 (s, 2H), 2.46 (s, 3H);  $^{13}\text{C}$  NMR (100 MHz,  $\text{CDCl}_3$ )  $\delta$  158.83, 157.97, 150.82, 141.06, 134.27, 131.97, 129.14, 128.64, 128.51, 128.29, 126.71, 120.61, 116.83, 112.42, 108.36, 20.94; IR (KBr)  $\nu$

3072, 1730, 1447, 1100, 969, 745  $\text{cm}^{-1}$ ; HRMS (ESI):  $m/z$  calcd. for  $([\text{C}_{18}\text{H}_{12}\text{O}_3 + \text{H}]^+)$ : 277.0859; found: 277.0859.

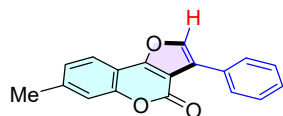

**7-Methyl-3-phenyl-4H-furo[3,2-c]chromen-4-one (3p).** White solid (72 mg, 52%); m.p. 194-195  $^{\circ}\text{C}$ ;  $^1\text{H}$  NMR (400 MHz,  $\text{CDCl}_3$ )  $\delta$  7.83 – 7.74 (m, 3H), 7.73 (s, 1H), 7.45 (t,  $J$  = 7.6 Hz, 2H), 7.38 (t,  $J$  = 7.1 Hz, 1H), 7.17 (d,  $J$  = 8.0 Hz, 1H), 2.48 (s, 3H);  $^{13}\text{C}$  NMR (101 MHz,  $\text{CDCl}_3$ )  $\delta$  158.83, 157.98, 150.82, 141.06, 134.28, 131.97, 129.14, 128.64, 128.51, 128.29, 126.72, 120.61, 116.83, 112.42, 108.36, 20.94; IR (KBr)  $\nu$  3062, 1738, 1445, 1096, 963, 747  $\text{cm}^{-1}$ ; HRMS (ESI):  $m/z$  calcd. for  $([\text{C}_{18}\text{H}_{12}\text{O}_3 + \text{H}]^+)$ : 277.0859; found: 277.0862.

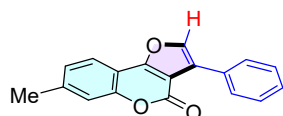

**2-Methyl-3-phenyl-4H-furo[3,2-c]chromen-4-one (5a).**<sup>3</sup> White solid (73 mg, 53% vs 78% as previous reported); m.p. 194-195  $^{\circ}\text{C}$ ;  $^1\text{H}$  NMR (400 MHz,  $\text{CDCl}_3$ )  $\delta$  7.86 (d,  $J$  = 7.8 Hz, 1H), 7.53 – 7.45 (m, 5H), 7.43 (d,  $J$  = 4.4 Hz, 1H), 7.42 – 7.30 (m, 2H), 2.52 (s, 3H);  $^{13}\text{C}$  NMR (100 MHz,  $\text{CDCl}_3$ )  $\delta$  157.68, 156.24, 152.29, 151.65, 130.23, 129.95, 129.85, 128.18, 127.74, 124.25, 120.54, 120.43, 117.04, 112.74, 109.60, 12.57; IR (KBr)  $\nu$  3067, 1735, 1443, 1103, 963, 750  $\text{cm}^{-1}$ ; HRMS (ESI):  $m/z$  calcd. for  $([\text{C}_{18}\text{H}_{12}\text{O}_3 + \text{H}]^+)$ : 277.0859; found: 277.0860.

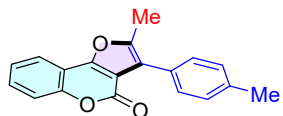

**2-Methyl-3-(p-tolyl)-4H-furo[3,2-c]chromen-4-one (5b).**<sup>6</sup> White solid (83 mg, 57% vs 76% as previous reported); m.p. 162-163  $^{\circ}\text{C}$ ;  $^1\text{H}$  NMR (400 MHz,  $\text{CDCl}_3$ )  $\delta$  7.85 (d,  $J$  = 7.8 Hz, 1H), 7.46 (d,  $J$  = 7.2 Hz, 1H), 7.44 – 7.37 (m, 3H), 7.28 (t,  $J$  = 12.3 Hz, 3H), 2.51 (s, 3H), 2.40 (s, 3H);  $^{13}\text{C}$  NMR (100 MHz,  $\text{CDCl}_3$ )  $\delta$  157.73, 156.15, 152.26, 151.41, 137.51, 130.14, 129.69, 128.93, 126.92, 124.21, 120.50, 120.34, 117.01, 112.78, 109.67, 21.27, 12.54; IR (KBr)  $\nu$  3027, 2922, 1736, 1499, 1320, 1115, 750  $\text{cm}^{-1}$ ; HRMS (ESI):  $m/z$  calcd. for  $([\text{C}_{19}\text{H}_{14}\text{O}_3 + \text{H}]^+)$ : 291.1016; found: 291.1017.

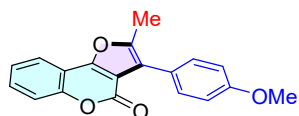

**3-(4-Methoxyphenyl)-2-methyl-4H-furo[3,2-c]chromen-4-one (5c).**<sup>6</sup> White solid (89 mg, 58% vs 72% as previous reported); m.p. 168-169  $^{\circ}\text{C}$ ;  $^1\text{H}$  NMR (400 MHz,  $\text{CDCl}_3$ )  $\delta$  7.87 (d,  $J$  = 7.8 Hz, 1H), 7.53 – 7.40 (m, 4H), 7.34 (d,  $J$  = 7.7 Hz, 1H), 7.00 (d,  $J$  = 8.7 Hz, 2H), 3.86 (s, 3H), 2.51 (s, 3H);  $^{13}\text{C}$  NMR (100 MHz,  $\text{CDCl}_3$ )  $\delta$  159.16, 157.87, 156.15, 152.29, 151.22, 131.04, 130.16, 124.25, 122.17, 120.54, 120.08, 117.06, 113.73, 112.84, 109.71, 55.26, 12.57; IR (KBr)  $\nu$  3446, 2935, 2839, 1739, 1515, 1174, 756  $\text{cm}^{-1}$ ; HRMS (ESI):  $m/z$  calcd. for  $([\text{C}_{19}\text{H}_{14}\text{O}_4 + \text{H}]^+)$ : 307.0965; found: 307.0966.

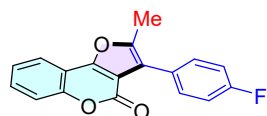

**3-(4-Fluorophenyl)-2-methyl-4H-furo[3,2-c]chromen-4-one (5d).**<sup>2</sup> White solid (59 mg, 40% vs 76% as previous reported); m.p. 198-199 °C; <sup>1</sup>H NMR (400 MHz, CDCl<sub>3</sub>) δ 7.87 (dd, *J* = 7.8, 0.9 Hz, 1H), 7.53 – 7.41 (m, 4H), 7.35 (t, *J* = 7.5 Hz, 1H), 7.15 (t, *J* = 8.7 Hz, 2H), 2.51 (s, 3H); <sup>13</sup>C NMR (100 MHz, CDCl<sub>3</sub>) δ 162.38 (d, *J*<sub>C-F</sub> = 245.6 Hz), 157.76, 156.31, 152.31, 151.59, 131.59 (d, *J*<sub>C-F</sub> = 8.2 Hz), 130.36, 125.92 (d, *J*<sub>C-F</sub> = 3.5 Hz), 124.35, 120.59, 119.53, 117.10, 115.26 (d, *J*<sub>C-F</sub> = 21.5 Hz), 112.70, 109.52, 12.52; IR (KBr) ν 3437, 2867, 1730, 1512, 1076, 758 cm<sup>-1</sup>; HRMS (ESI): *m/z* calcd. for ([C<sub>18</sub>H<sub>11</sub>FO<sub>3</sub>+H]<sup>+</sup>): 295.0765; found: 295.0766.

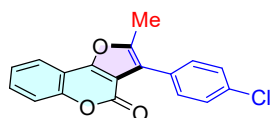

**3-(4-Chlorophenyl)-2-methyl-4H-furo[3,2-c]chromen-4-one (5e).**<sup>7</sup> White solid (78 mg, 50% vs 77% as previous reported); m.p. 176-177 °C; <sup>1</sup>H NMR (400 MHz, CDCl<sub>3</sub>) δ 7.87 (d, *J* = 7.8 Hz, 1H), 7.50 (t, *J* = 7.8 Hz, 1H), 7.47 – 7.39 (m, 5H), 7.34 (t, *J* = 7.5 Hz, 1H), 2.52 (s, 3H); <sup>13</sup>C NMR (100 MHz, CDCl<sub>3</sub>) δ 157.69, 156.40, 152.31, 151.77, 133.79, 131.15, 130.43, 128.46, 128.42, 124.37, 120.60, 119.43, 117.09, 112.63, 109.40, 12.57; IR (KBr) ν 3443, 2877, 1749, 1502, 1070, 744 cm<sup>-1</sup>; HRMS (ESI): *m/z* calcd. for ([C<sub>18</sub>H<sub>11</sub>ClO<sub>3</sub>+H]<sup>+</sup>): 311.0469; found: 311.0470.

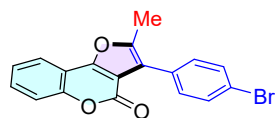

**3-(4-Bromophenyl)-2-methyl-4H-furo[3,2-c]chromen-4-one (5f).**<sup>7</sup> White solid (66 mg, 52% vs 61% as previous reported); m.p. 162-163 °C; <sup>1</sup>H NMR (400 MHz, CDCl<sub>3</sub>) δ 7.87 (d, *J* = 7.8 Hz, 1H), 7.58 (d, *J* = 8.4 Hz, 2H), 7.50 (d, *J* = 7.2 Hz, 1H), 7.45 – 7.32 (m, 4H), 2.52 (s, 3H); <sup>13</sup>C NMR (100 MHz, CDCl<sub>3</sub>) δ 157.69, 156.44, 152.33, 151.74, 131.46, 131.42, 130.45, 128.91, 124.39, 122.04, 120.61, 119.48, 117.11, 112.63, 109.36, 12.58; IR (KBr) ν 3444, 2988, 1749, 1500, 1156, 745 cm<sup>-1</sup>; HRMS (ESI): *m/z* calcd. for ([C<sub>18</sub>H<sub>11</sub>BrO<sub>3</sub>+H]<sup>+</sup>): 354.9964; found: 354.9965.

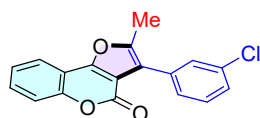

**3-(3-Chlorophenyl)-2-methyl-4H-furo[3,2-c]chromen-4-one (5g).**<sup>3</sup> White solid (56 mg, 36% vs 47% as previous reported); m.p. 139-140 °C; <sup>1</sup>H NMR (400 MHz, CDCl<sub>3</sub>) δ 7.89 (dd, *J* = 7.8, 1.2 Hz, 1H), 7.54 – 7.33 (m, 7H), 2.54 (s, 3H); <sup>13</sup>C NMR (100 MHz, CDCl<sub>3</sub>) δ 157.59, 156.44, 152.38, 152.07, 134.02, 131.83, 130.49, 129.70, 129.48, 128.27, 127.93, 124.39, 120.64, 119.33, 117.16, 112.65, 109.42, 12.61; IR (KBr) ν 3437, 2986, 1736, 1500, 1103, 756 cm<sup>-1</sup>; HRMS (ESI): *m/z* calcd. for ([C<sub>18</sub>H<sub>11</sub>ClO<sub>3</sub>+H]<sup>+</sup>): 311.0469; found: 311.0470.

## References

1. A. G. M. Barrett and G. G. Graboski, *Chem. Rev.*, 1986, **86**, 751-762.
2. P. H. Pham, Q. T. D. Nguyen, N. K. Q. Tran, V. H. H. Nguyen, S. H. Doan, H. Q. Ha, T. Truong and N. T. S. Phan, *Eur. J. Org. Chem.*, 2018, **2018**, 4431-4435.
3. Q. T. Pham, P. Q. Le, H. V. Dang, H. Q. Ha, H. T. D. Nguyen, T. Truong and T. M. Le, *RSC*

- Adv.*, 2020, **10**, 44332-44338.
4. T. A. To, Y. H. Vo, A. T. Nguyen, A. N. Q. Phan, T. Truong and N. T. S. Phan, *Org. Biomol. Chem.*, 2018, **16**, 5086-5089.
  5. M. He, Z. Yan, W. Wang, F. Zhu, S. Lin, *Tetrahedron Lett.*, 2018, **59**, 3706-3712.
  6. M. Ghost and A. Hajra, *Eur. J. Org. Chem.*, 2015, **2015**, 7836-7841.
  7. Q. Ren, J. Kang, M. Li, L. Yuan, R. Chen and L. Wang, *Eur. J. Org. Chem.*, 2017, **2017**, 5566-5571.



#### 4. X-ray crystallographic data of compound **5d**

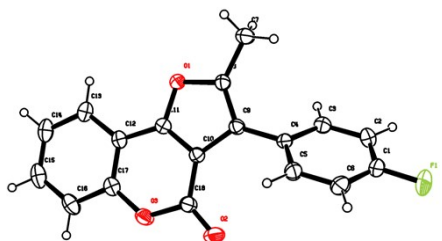

**Figure S1.** ORTEP drawing of compound **5d** (30% probability for the thermal ellipsoid).

The purified compound **5d** is dissolved in a mixed solvent of dichloromethane and *n*-hexane, and placed in a dark cabinet to slowly evaporate. After several days, a colourless bulk crystal is obtained. The X-ray crystal-structure determinations were obtained on a Bruker Smart CCD APEX-2 diffractometer (graphite-monochromated Mo *K* $\alpha$  radiation,  $\lambda=0.71073$  nm) at 300 K.

**Table S1.** Crystal data and structure refinement for compound **5d**.

|                                        |                                                                                                                |
|----------------------------------------|----------------------------------------------------------------------------------------------------------------|
| CCDC number                            | 2354856                                                                                                        |
| Identification code                    | mo_20210121a_0m_a                                                                                              |
| Empirical formula                      | C <sub>18</sub> H <sub>11</sub> FO <sub>3</sub>                                                                |
| Formula weight                         | 294.27                                                                                                         |
| Temperature                            | 300(2) K                                                                                                       |
| Wavelength                             | 0.71073 Å                                                                                                      |
| Crystal system                         | monoclinic                                                                                                     |
| Space group                            | P2 <sub>1</sub> /n                                                                                             |
| Unit cell dimensions                   | a = 6.9643(8) Å $\alpha$ = 90°.<br>b = 17.995(2) Å $\beta$ = 104.494(4)°.<br>c = 11.2480(13) Å $\gamma$ = 90°. |
| Volume                                 | 1364.7(3) Å <sup>3</sup>                                                                                       |
| Z                                      | 4                                                                                                              |
| Density (calculated)                   | 1.432 Mg/m <sup>3</sup>                                                                                        |
| Absorption coefficient                 | 0.106 mm <sup>-1</sup>                                                                                         |
| F(000)                                 | 608.0                                                                                                          |
| Crystal size                           | 0.230 × 0.210 × 0.200 mm <sup>3</sup>                                                                          |
| 2 $\theta$ range for data collection/° | 5.874 to 55.046°.                                                                                              |
| Index ranges                           | -9 ≤ h ≤ 8, -23 ≤ k ≤ 23, -14 ≤ l ≤ 14                                                                         |
| Reflections collected                  | 26551                                                                                                          |
| Independent reflections                | 3123 [R <sub>int</sub> = 0.0455, R <sub>sigma</sub> = 0.0257]                                                  |
| Data/restraints/parameters             | 3123/0/200                                                                                                     |
| Goodness-of-fit on F <sup>2</sup>      | 1.089                                                                                                          |
| Final R indices [I > 2sigma(I)]        | R1 = 0.0607, wR2 = 0.2102                                                                                      |
| R indices (all data)                   | R1 = 0.0886, wR2 = 0.2349                                                                                      |
| Largest diff. peak and hole            | 0.21 and -0.30 e.Å <sup>-3</sup>                                                                               |

## 5. $^1\text{H}$ , $^{13}\text{C}$ NMR spectra for all compounds

### 3-Phenyl-4H-furo[3,2-c]chromen-4-one (Table 2, compound 3a)

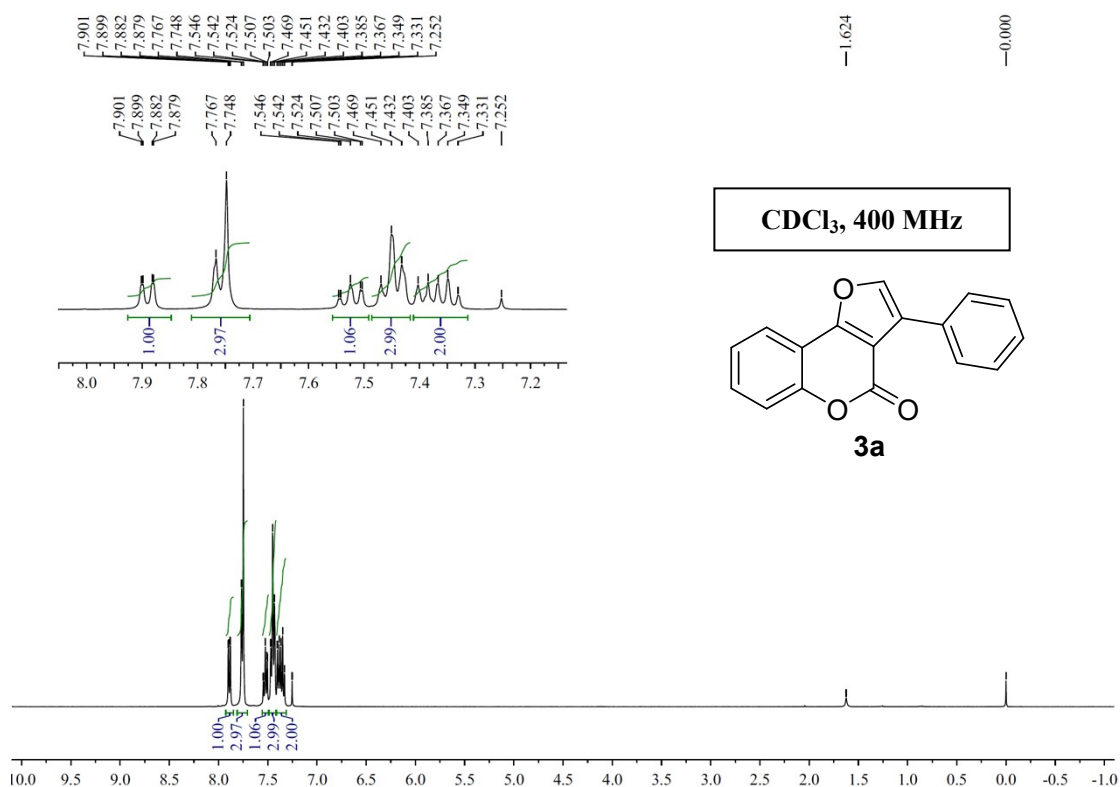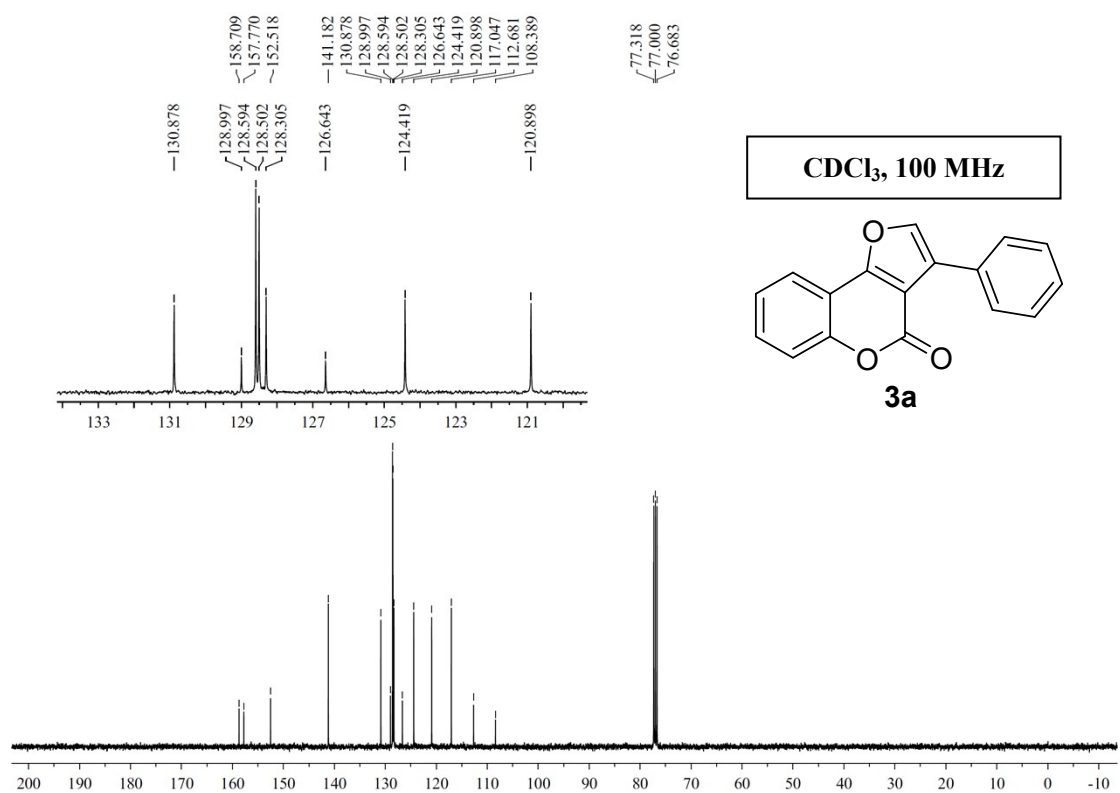

3-(4-Methoxyphenyl)-4H-furo[3,2-c]chromen-4-one (Table 2, compound 3b)

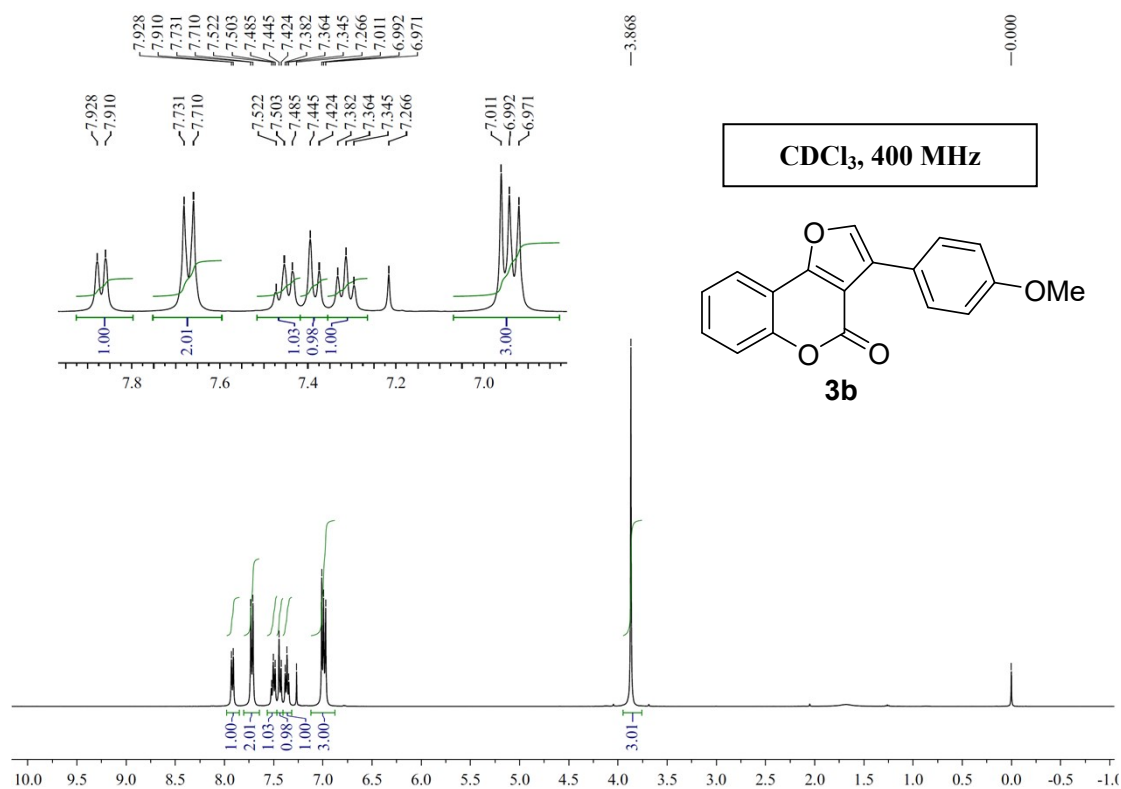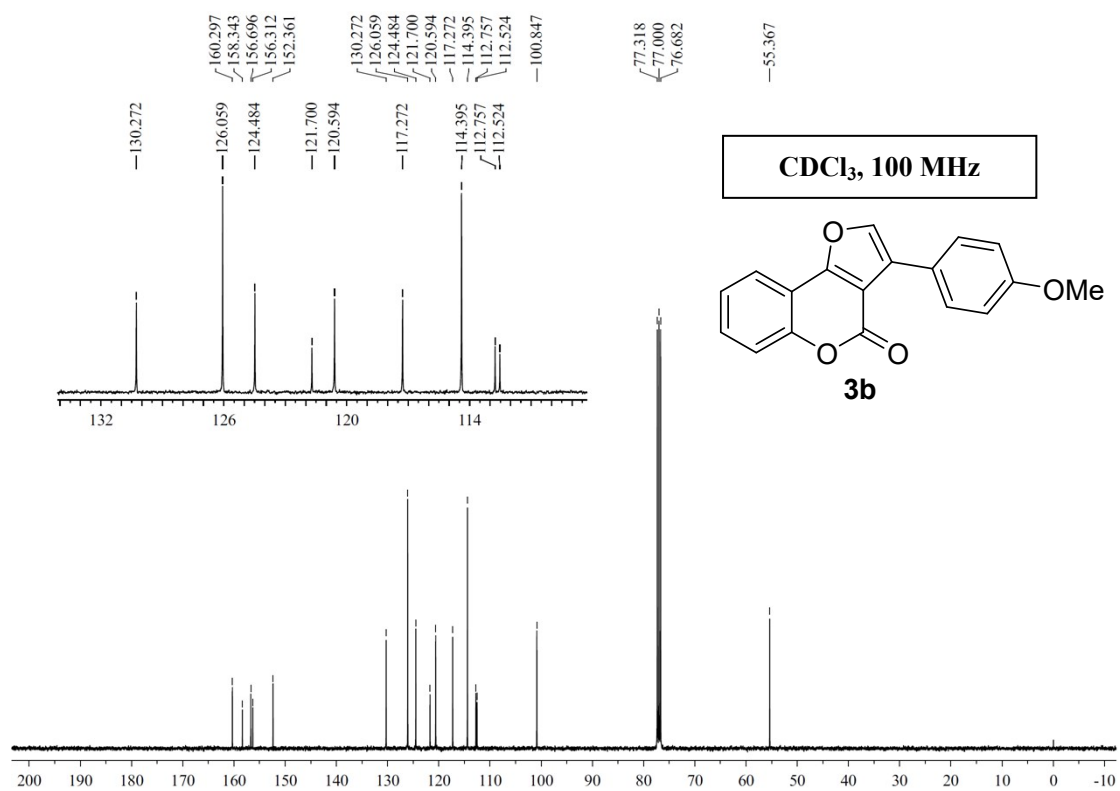

3-(4-Chlorophenyl)-4H-furo[3,2-c]chromen-4-one (Table 2, compound 3c)

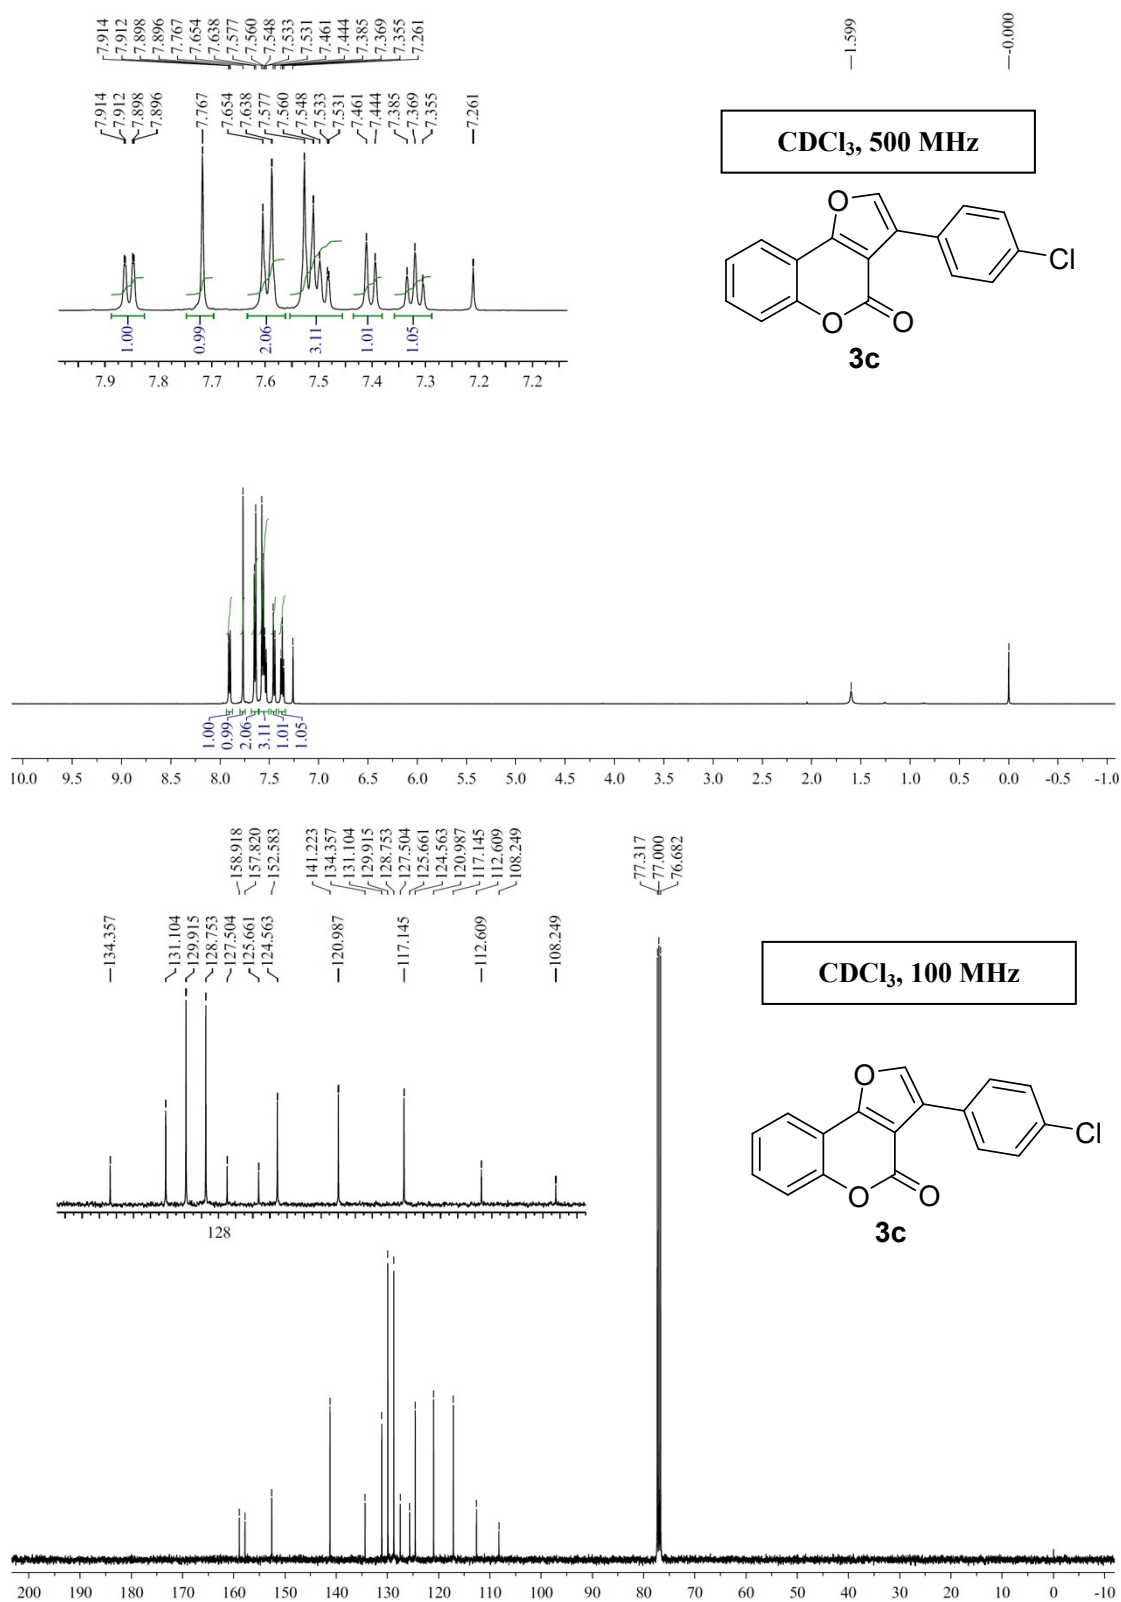

**3-(4-Bromophenyl)-4H-furo[3,2-c]chromen-4-one (Table 2, compound 3d)**

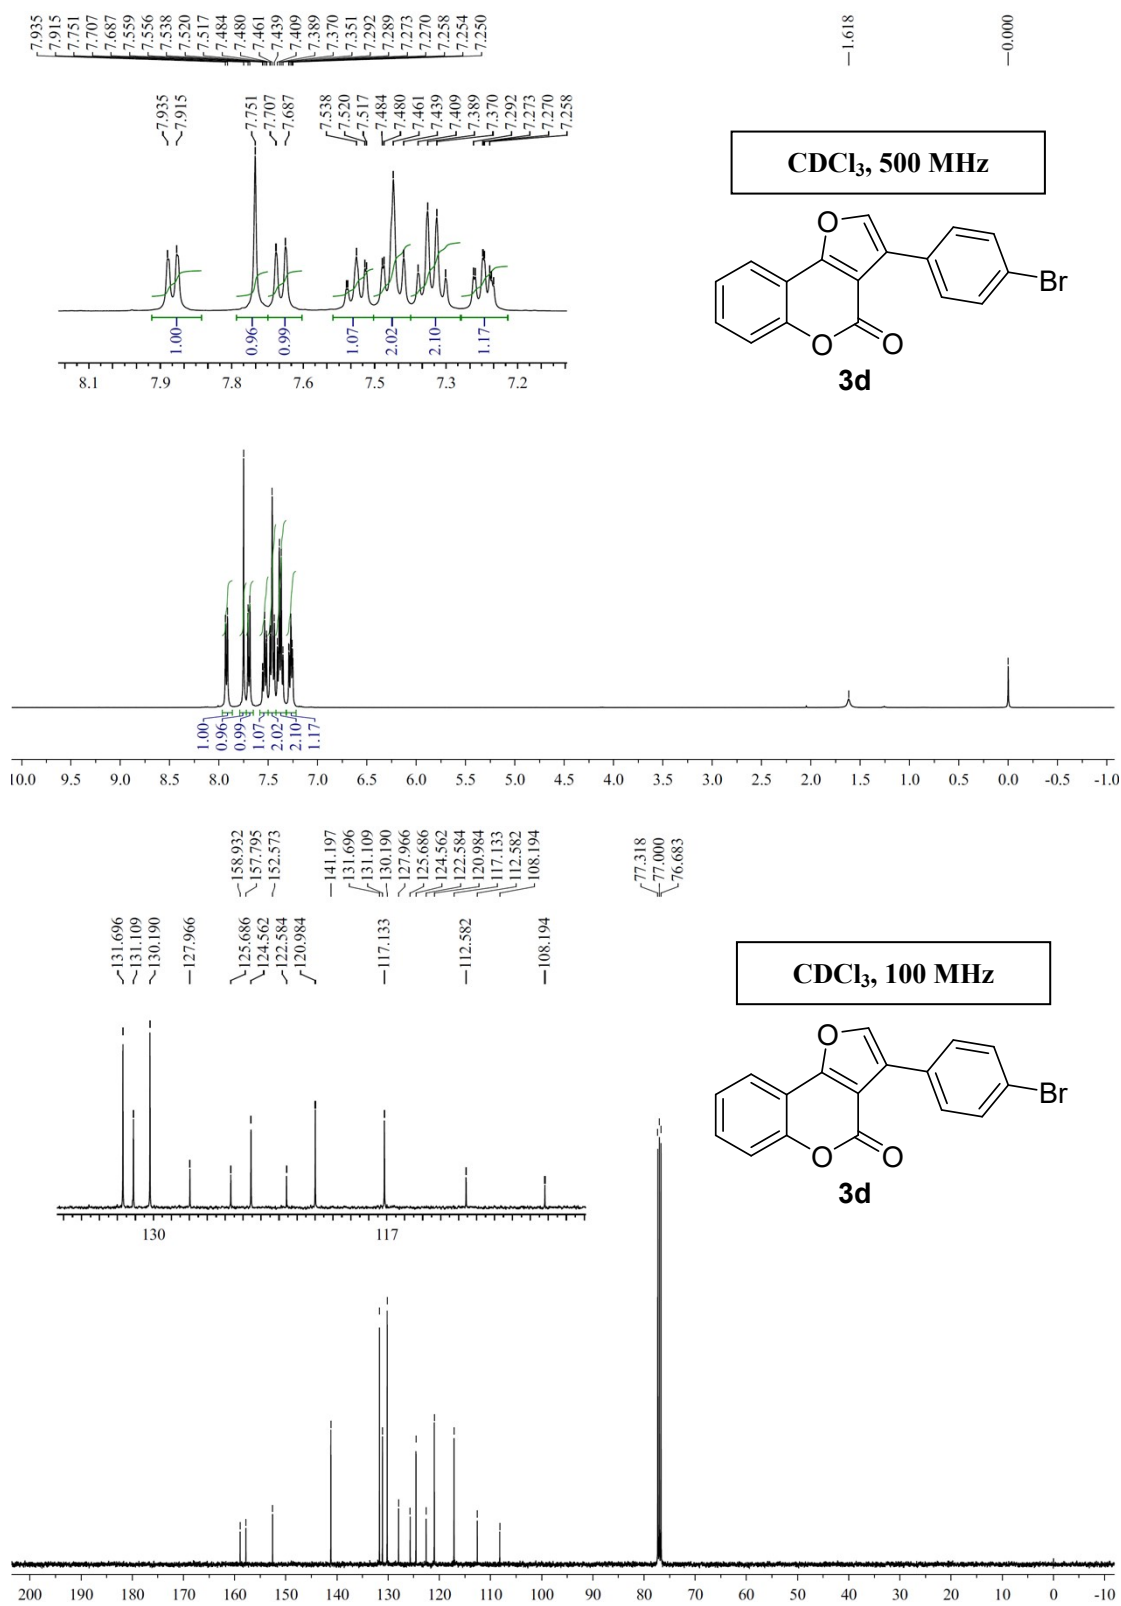

**3-(3-Methoxyphenyl)-4H-furo[3,2-c]chromen-4-one (Table 2, compound 3e)**

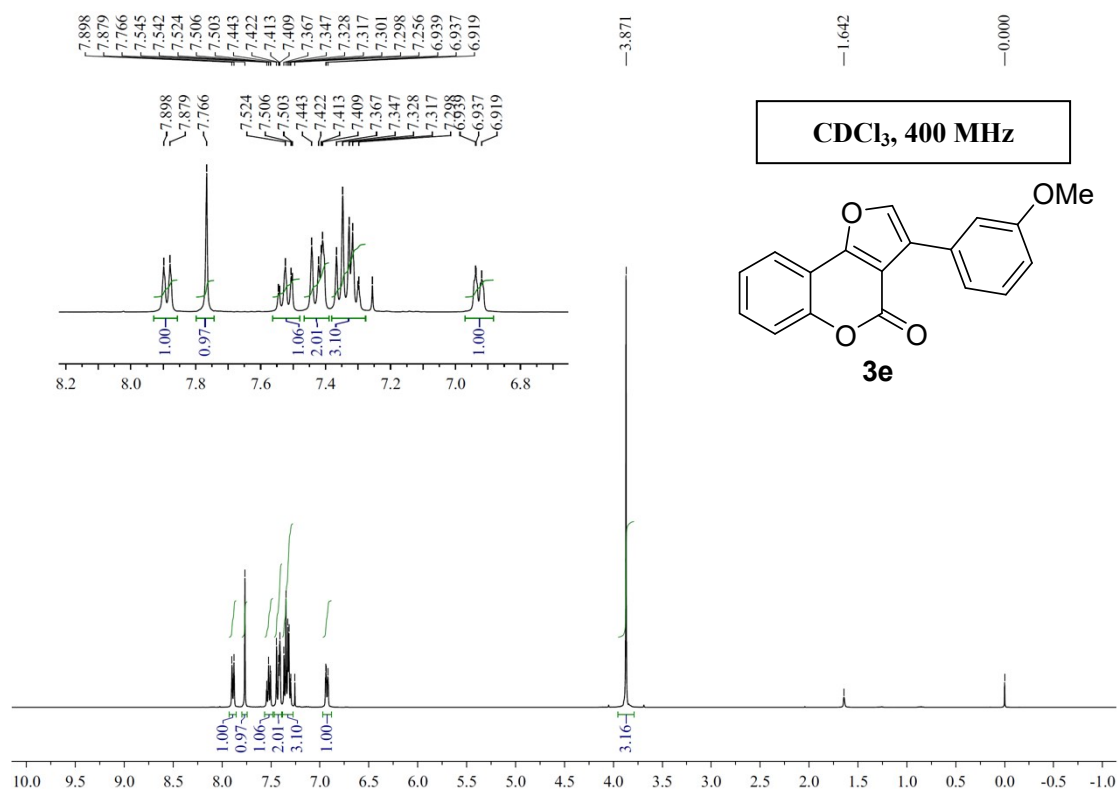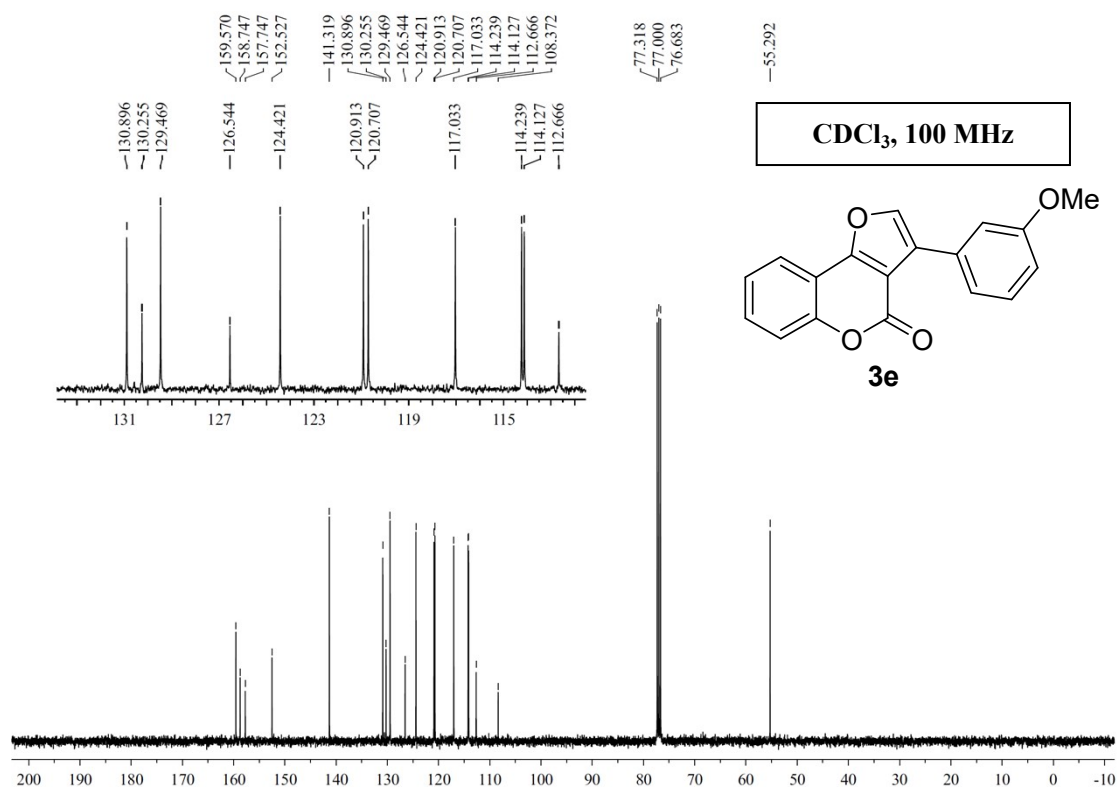

**3-(3-Chlorophenyl)-4H-furo[3,2-c]chromen-4-one (Table 2, compound 3f)**

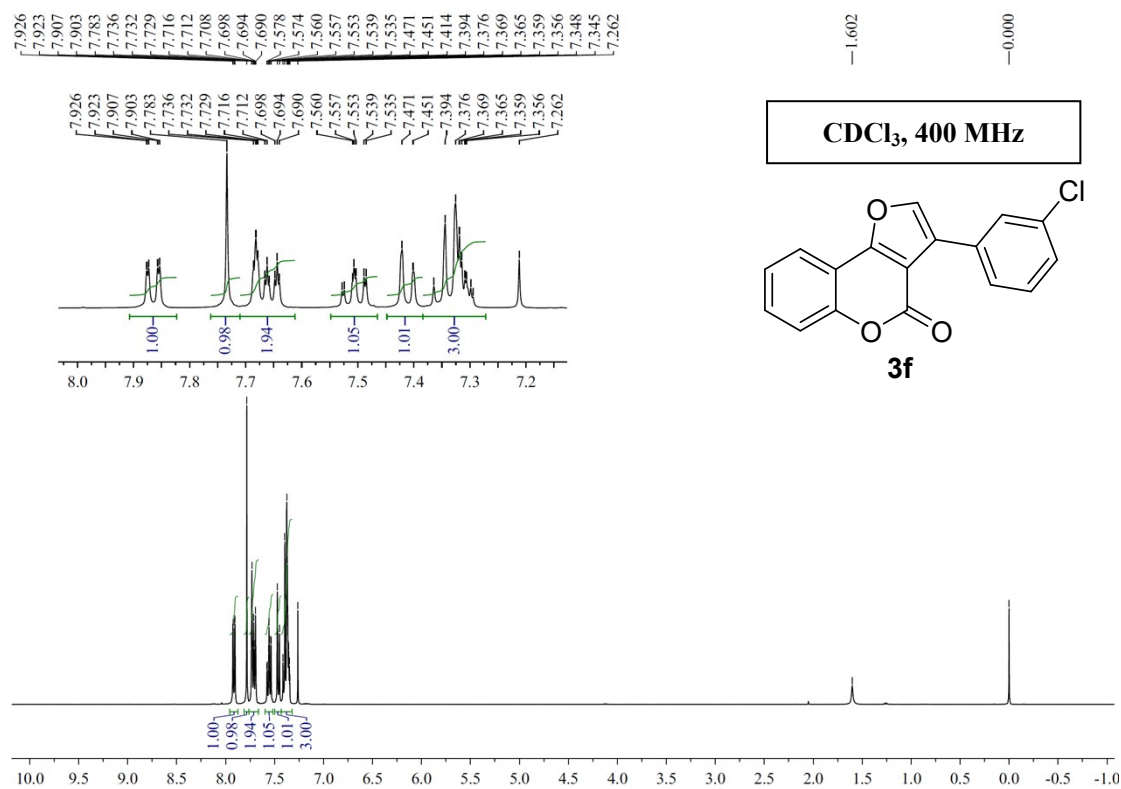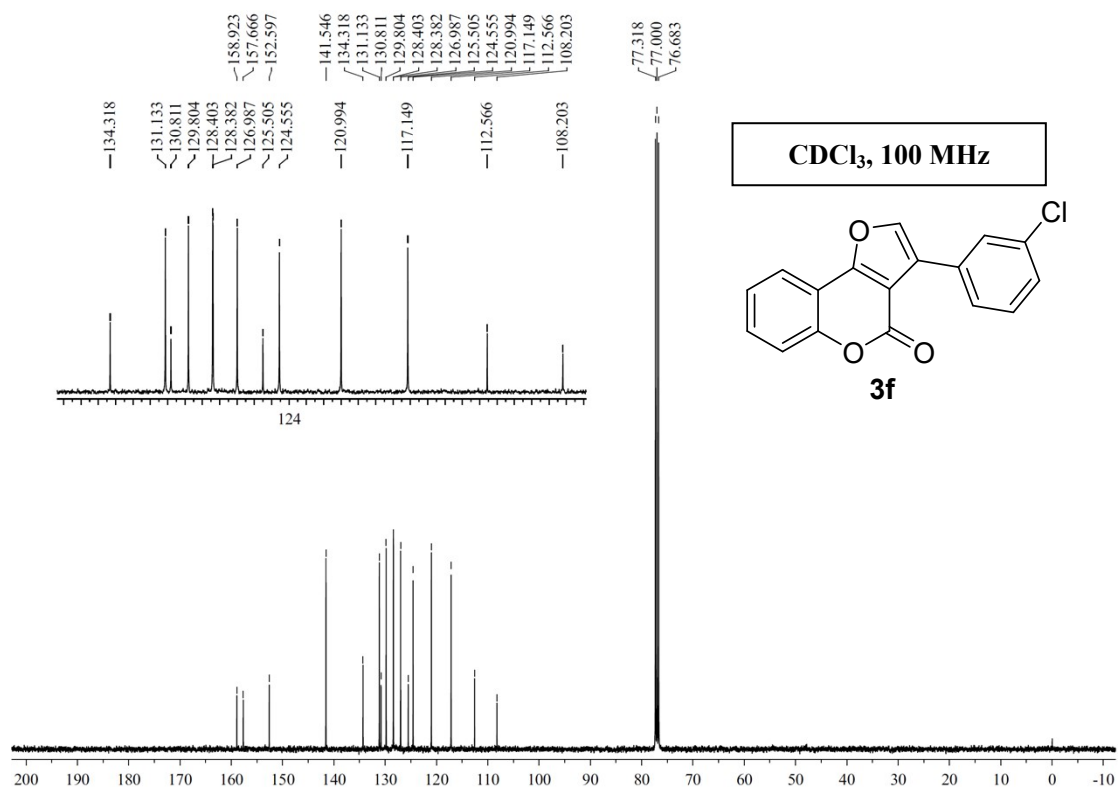

3-(3-Bromophenyl)-4H-furo[3,2-c]chromen-4-one (Table 2, compound 3g)

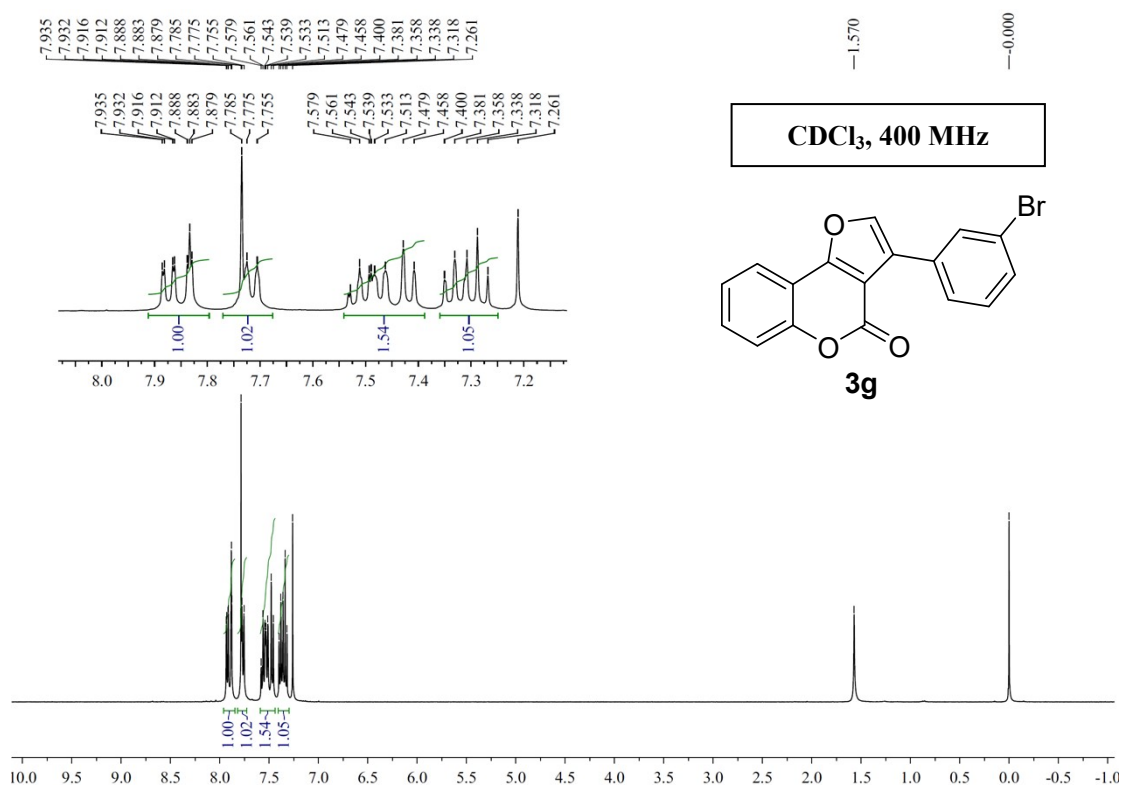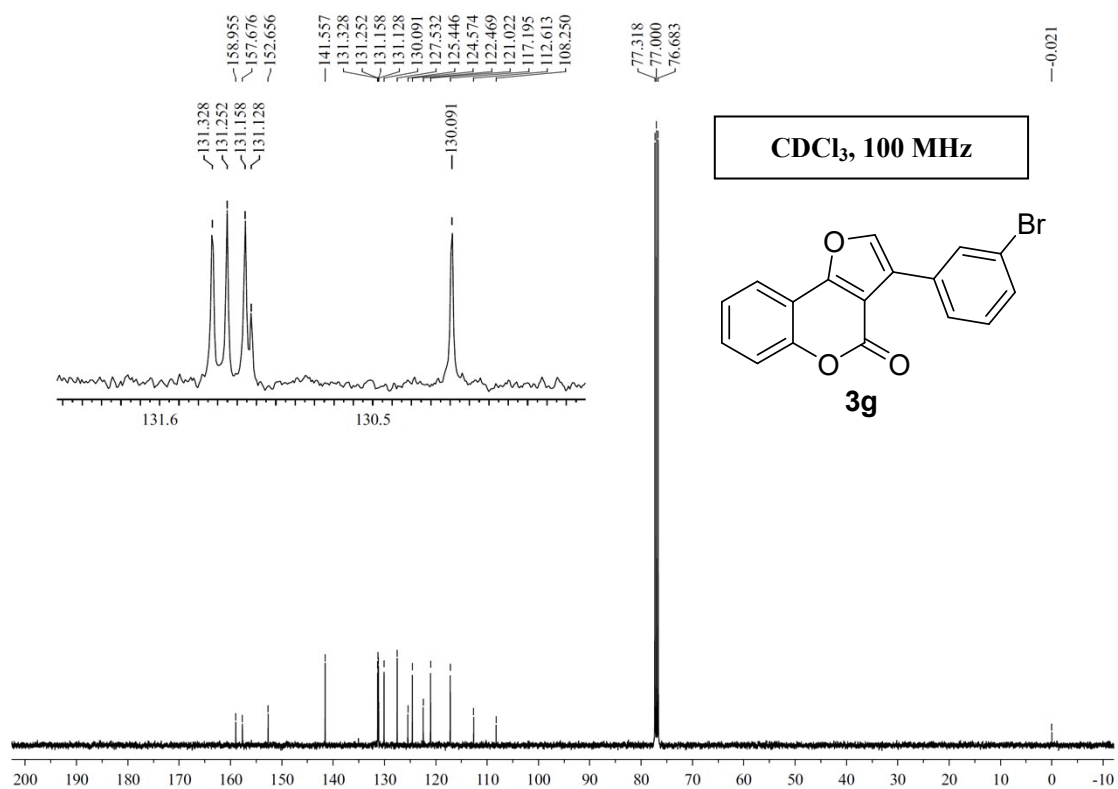



**3-(2-Methoxyphenyl)-4H-furo[3,2-c]chromen-4-one (Table 2, compound 3h)**

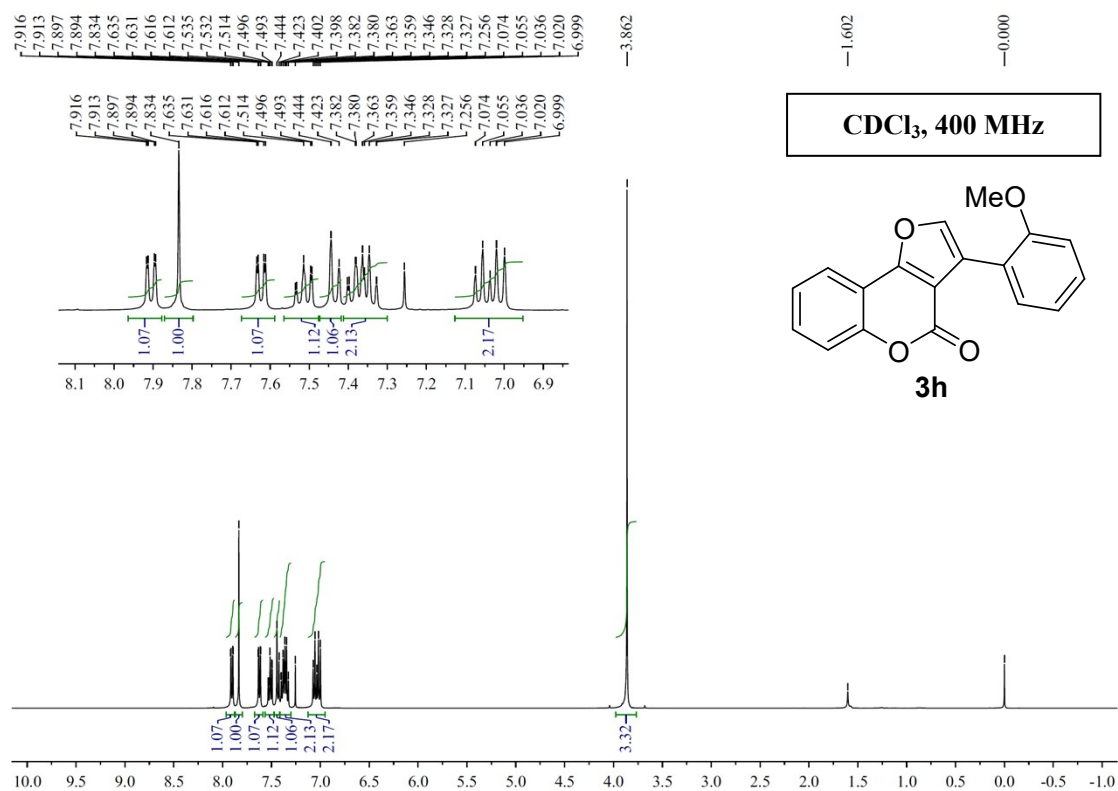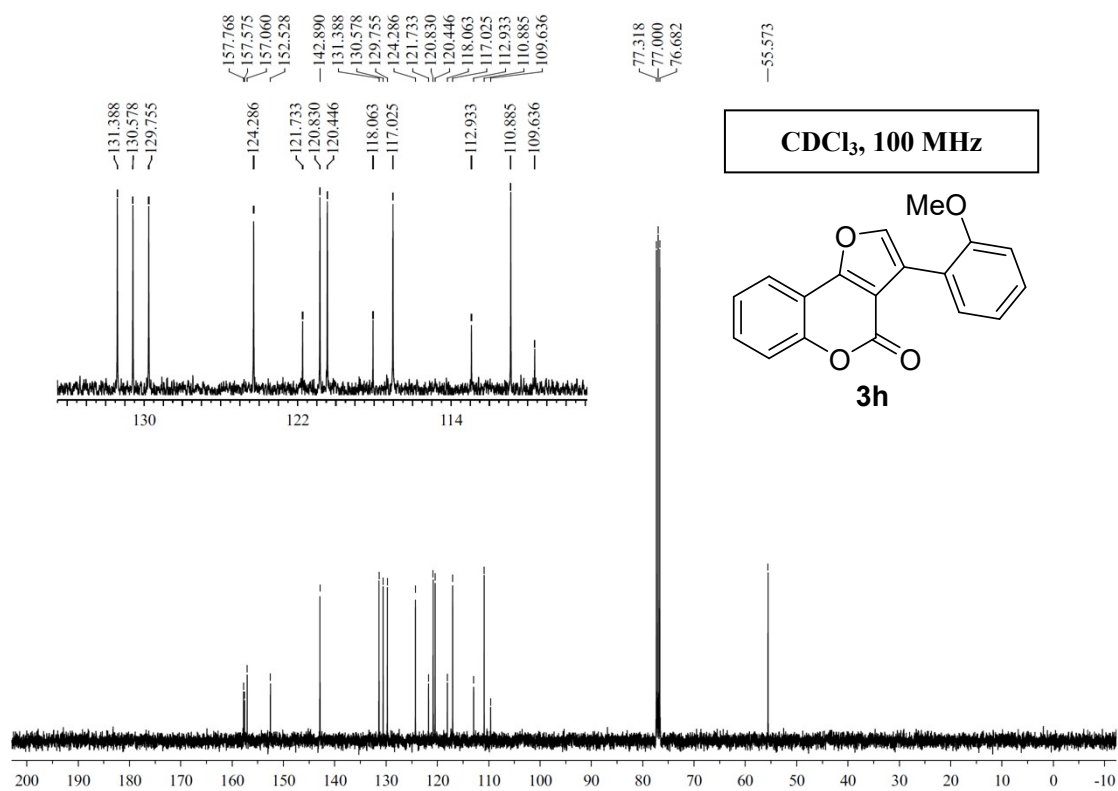

3-(2-Chlorophenyl)-4H-furo[3,2-c]chromen-4-one (Table 2, compound 3i)

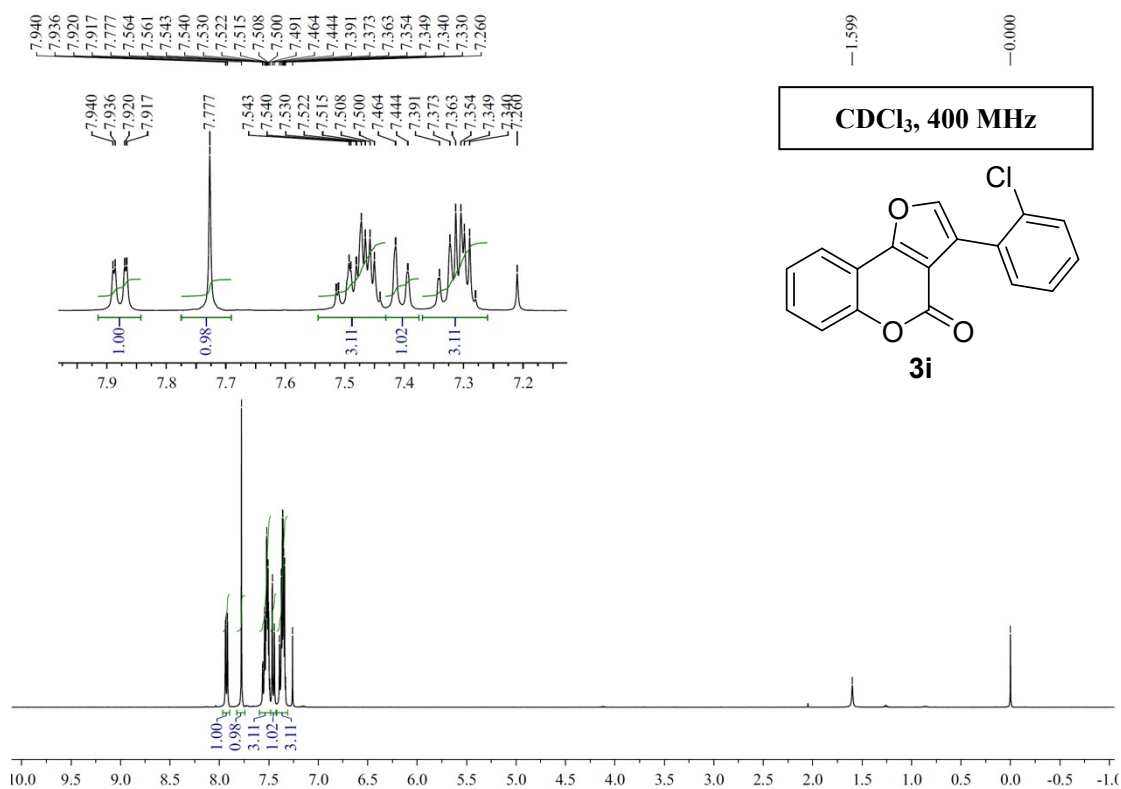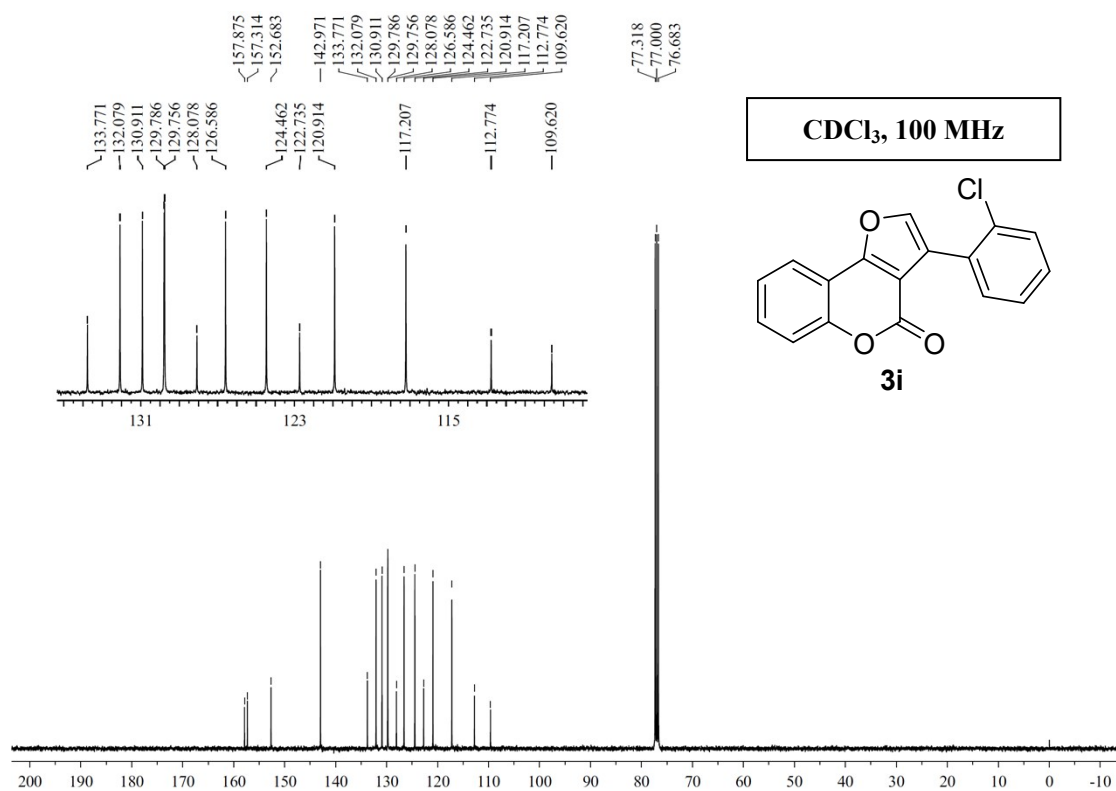

3-(2-Bromophenyl)-4H-furo[3,2-c]chromen-4-one (Table 2, compound 3j)

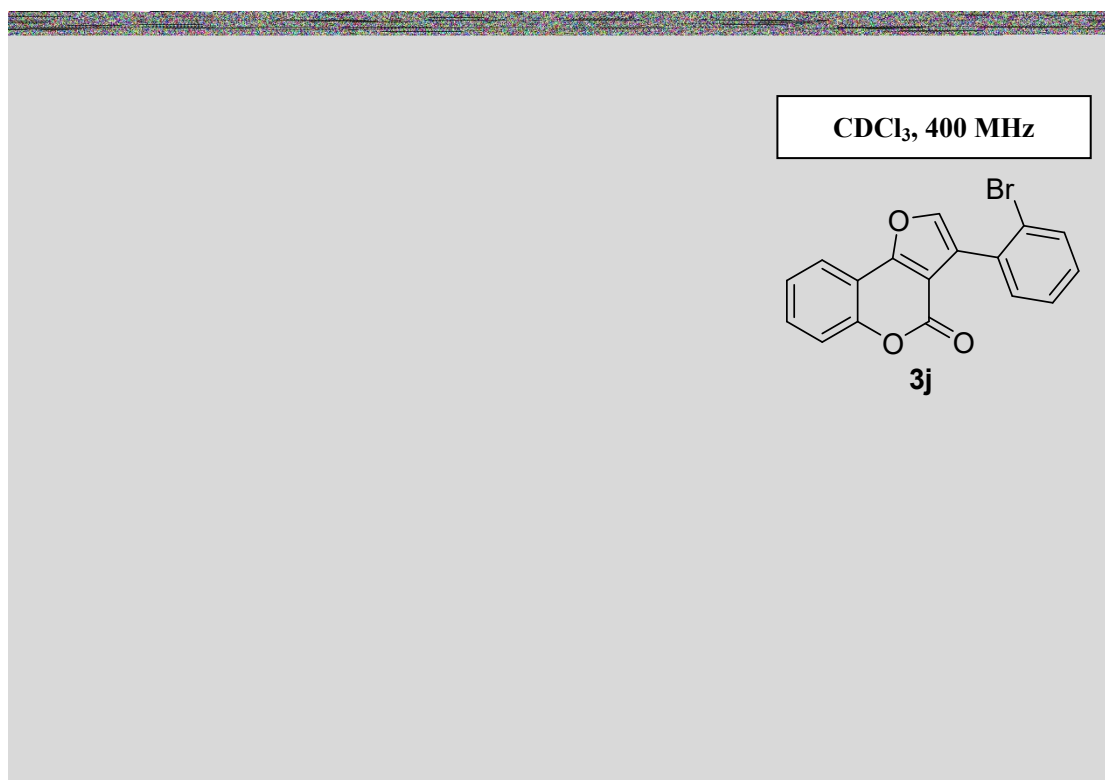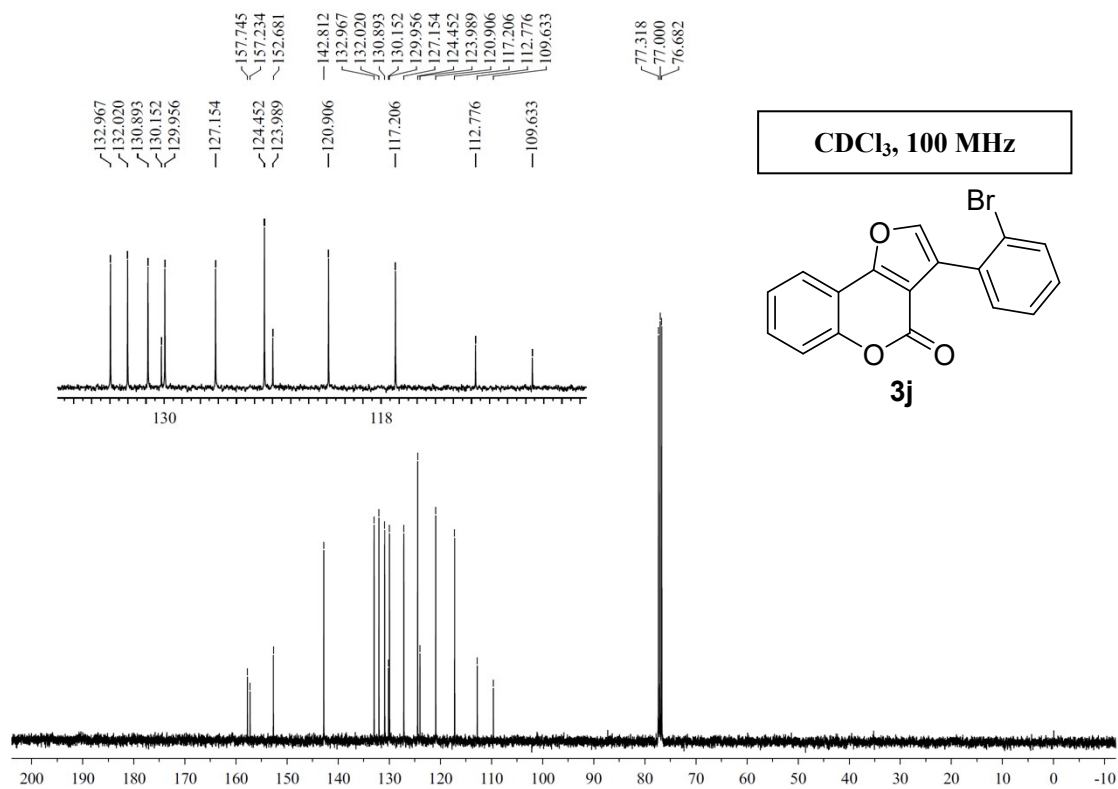

**3-(3,4-Dimethoxyphenyl)-4H-furo[3,2-c]chromen-4-one (Table 2, compound 3k)**

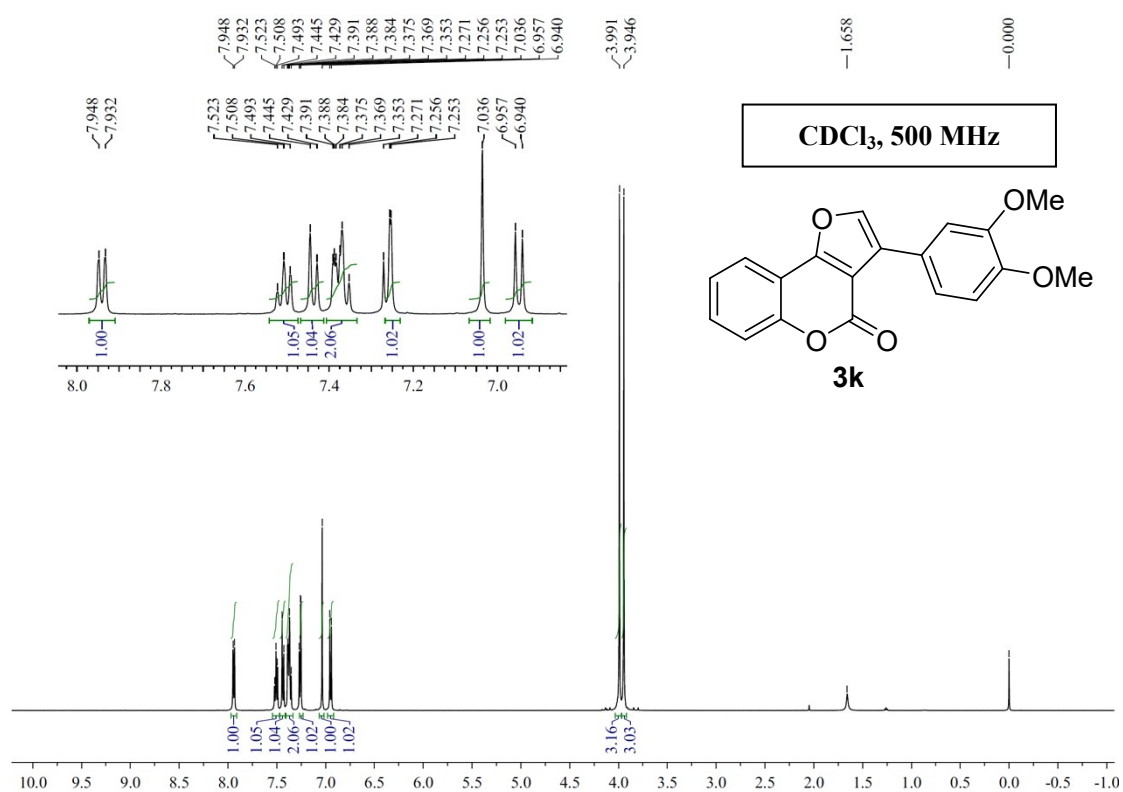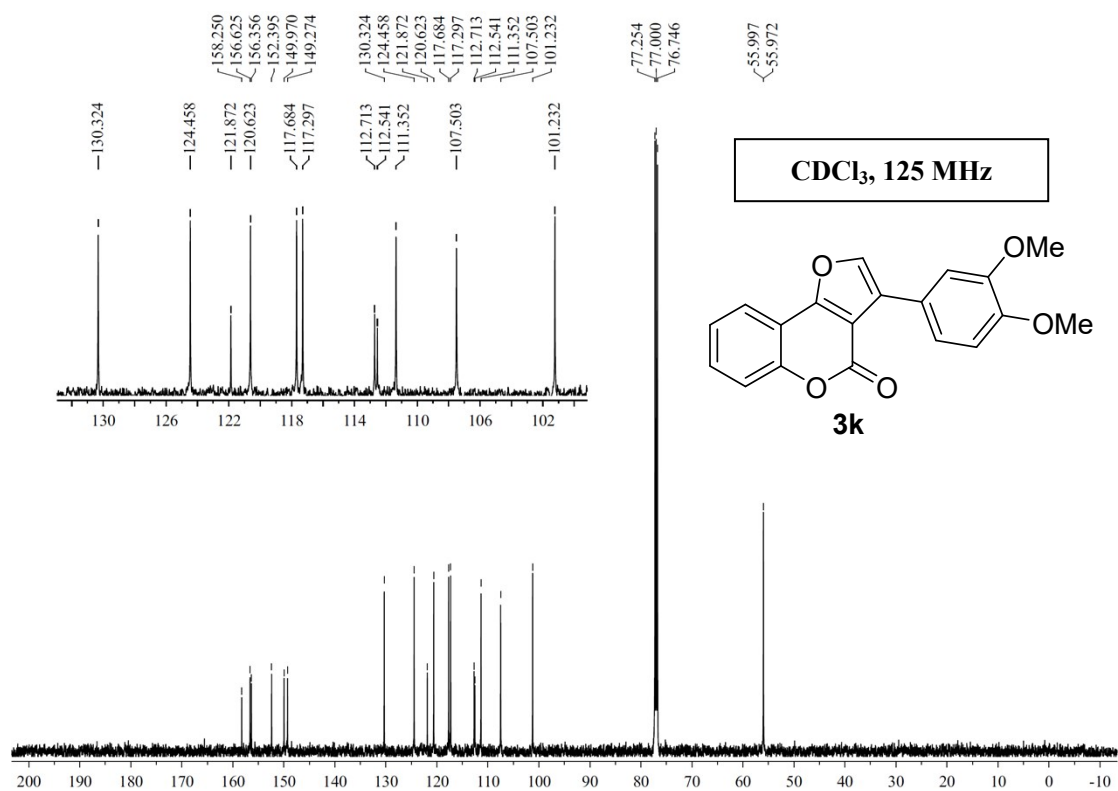

**8-Fluoro-3-phenyl-4H-furo[3,2-c]chromen-4-one (Table 2, compound 3I)**

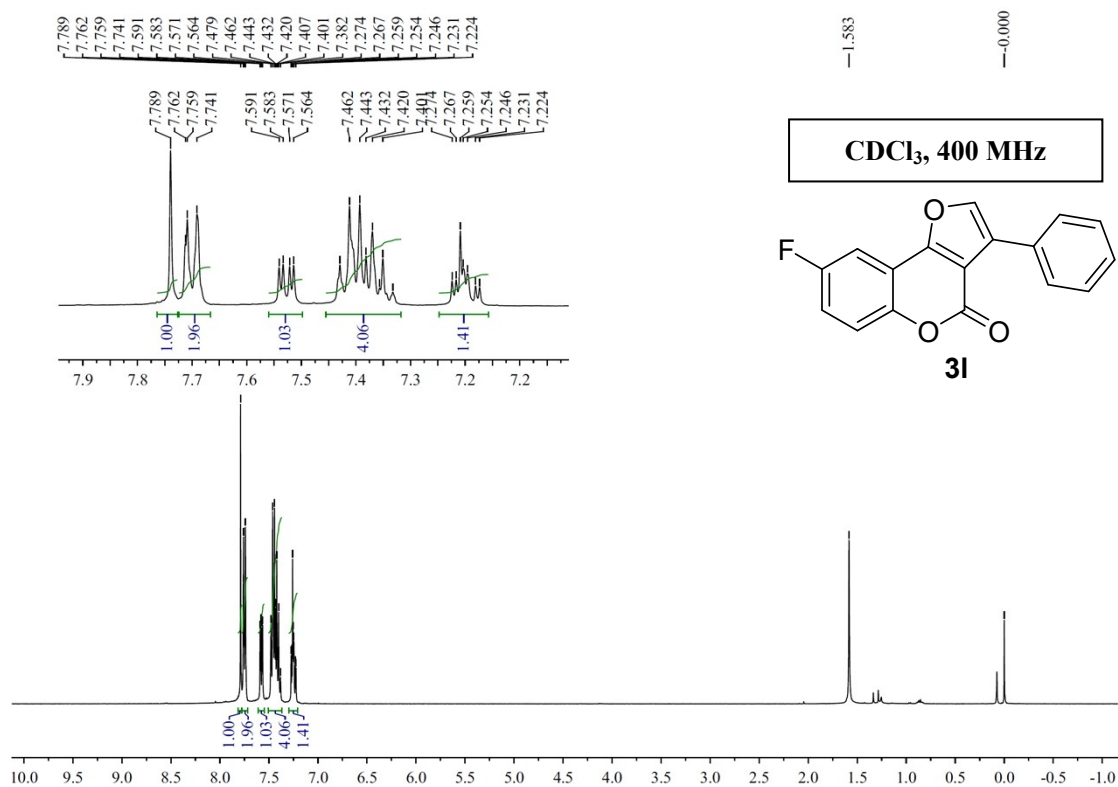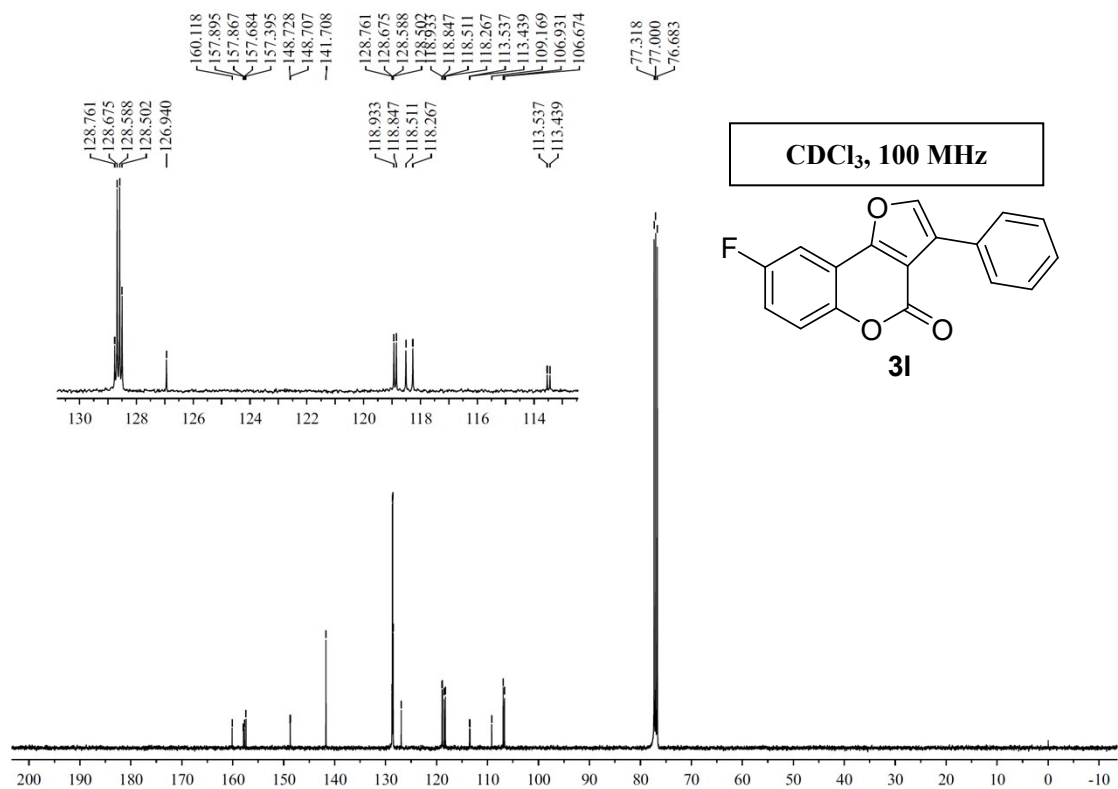

**8-Chloro-3-phenyl-4H-furo[3,2-c]chromen-4-one (Table 2, compound 3m)**

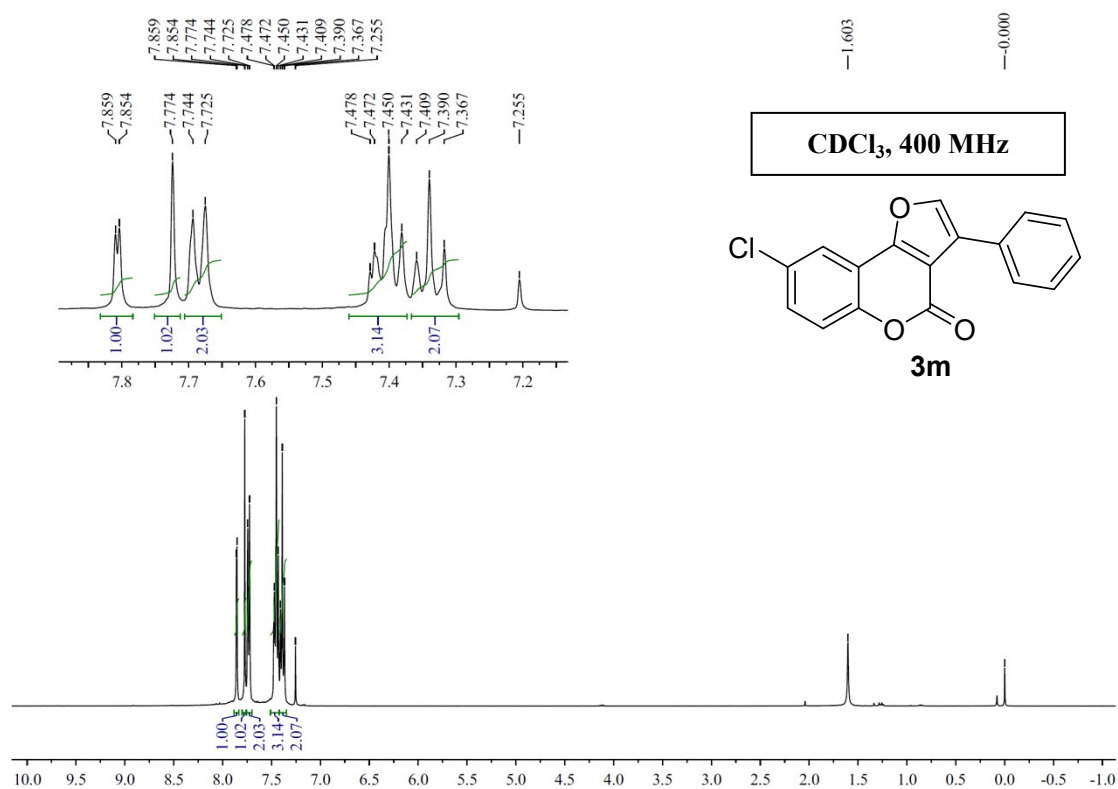

**CDCl<sub>3</sub>, 100 MHz**

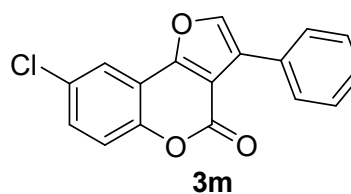

**8-Bromo-3-phenyl-4H-furo[3,2-c]chromen-4-one (Table 2, compound 3n)**

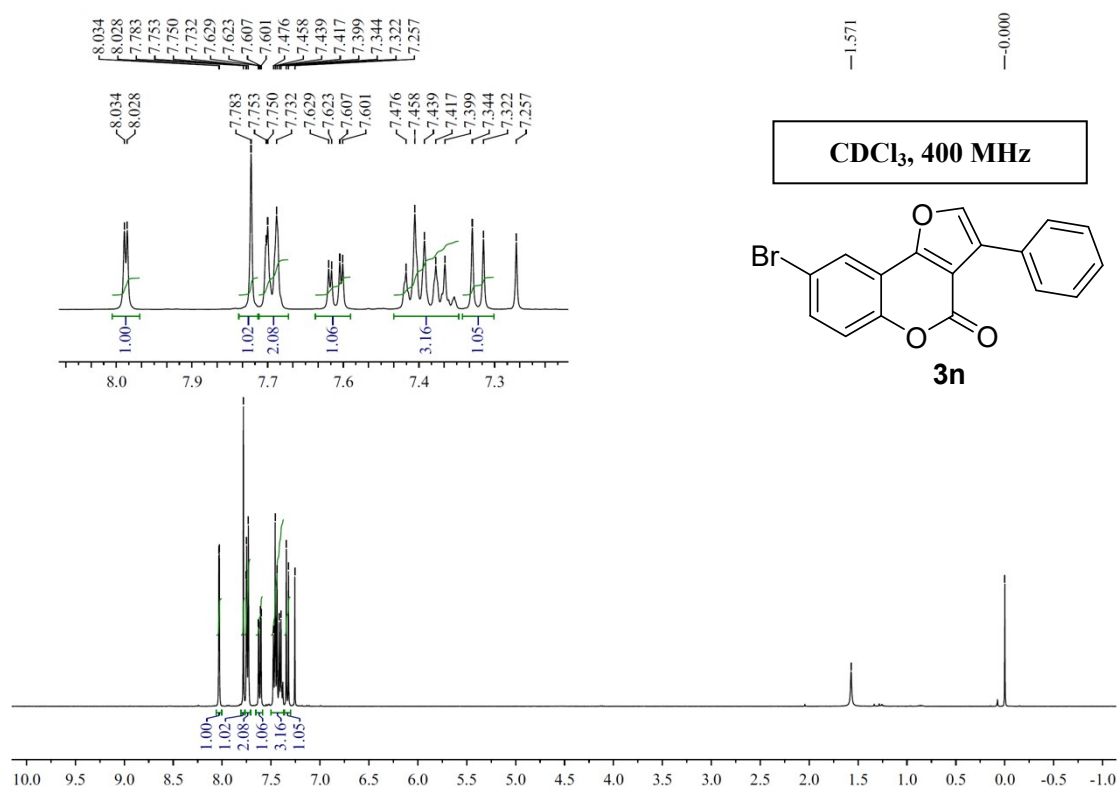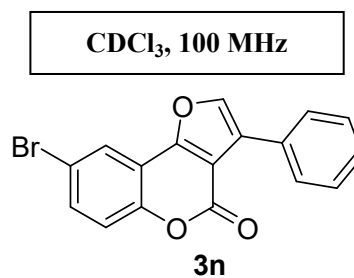

**8-Methyl-3-phenyl-4H-furo[3,2-c]chromen-4-one (Table 2, compound 3o)**

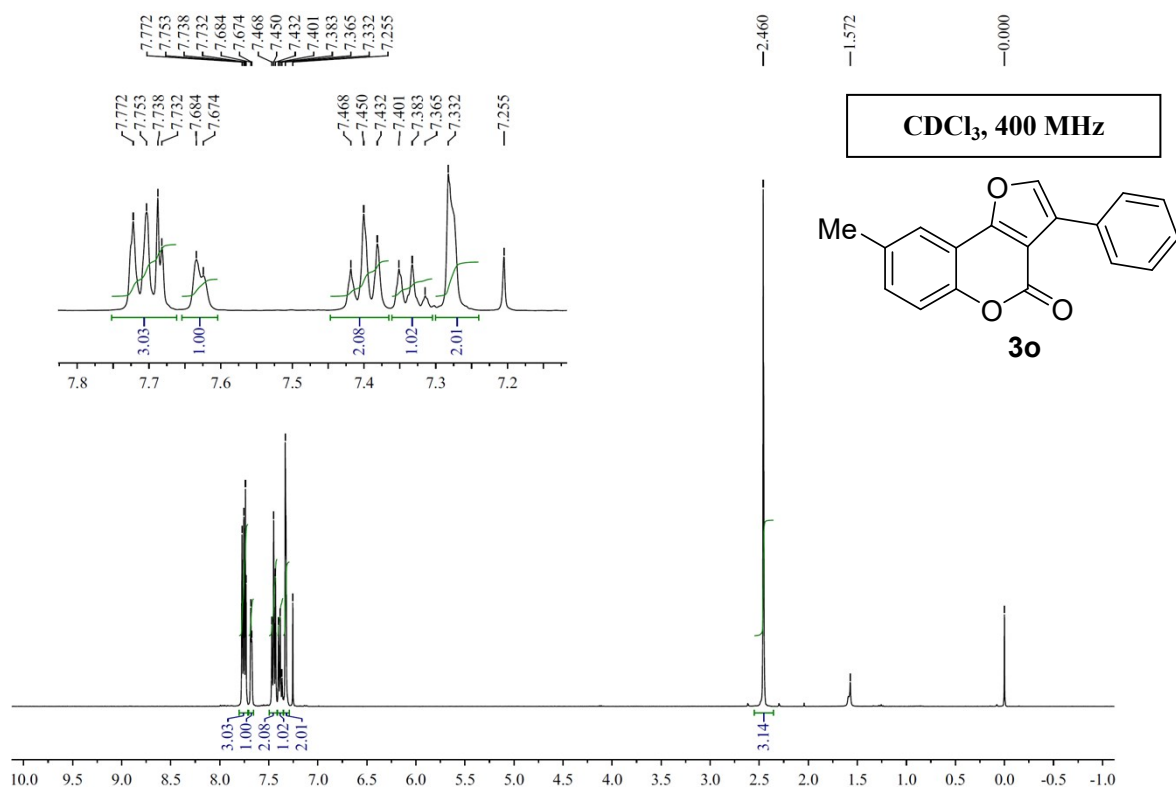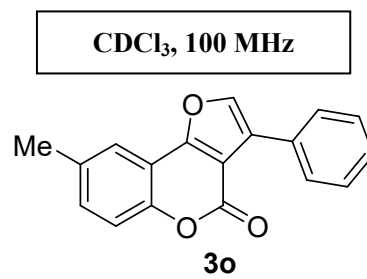



7-Methyl-3-phenyl-4H-furo[3,2-c]chromen-4-one (Table 2, compound 3p)

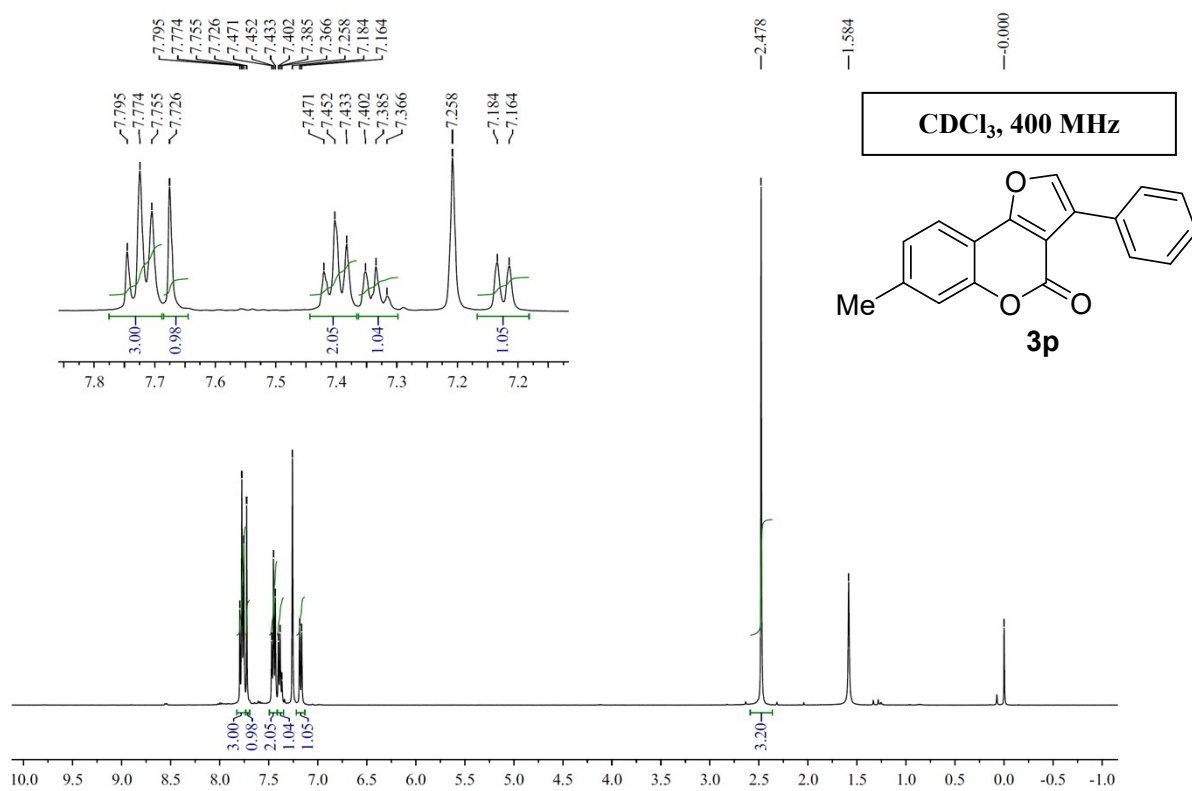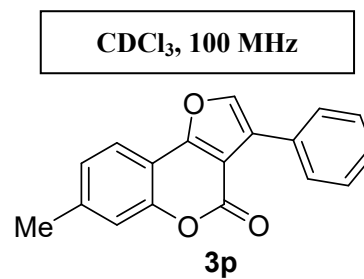

**2-Methyl-3-phenyl-4H-furo[3,2-c]chromen-4-one (Table 3, compound 5a)**

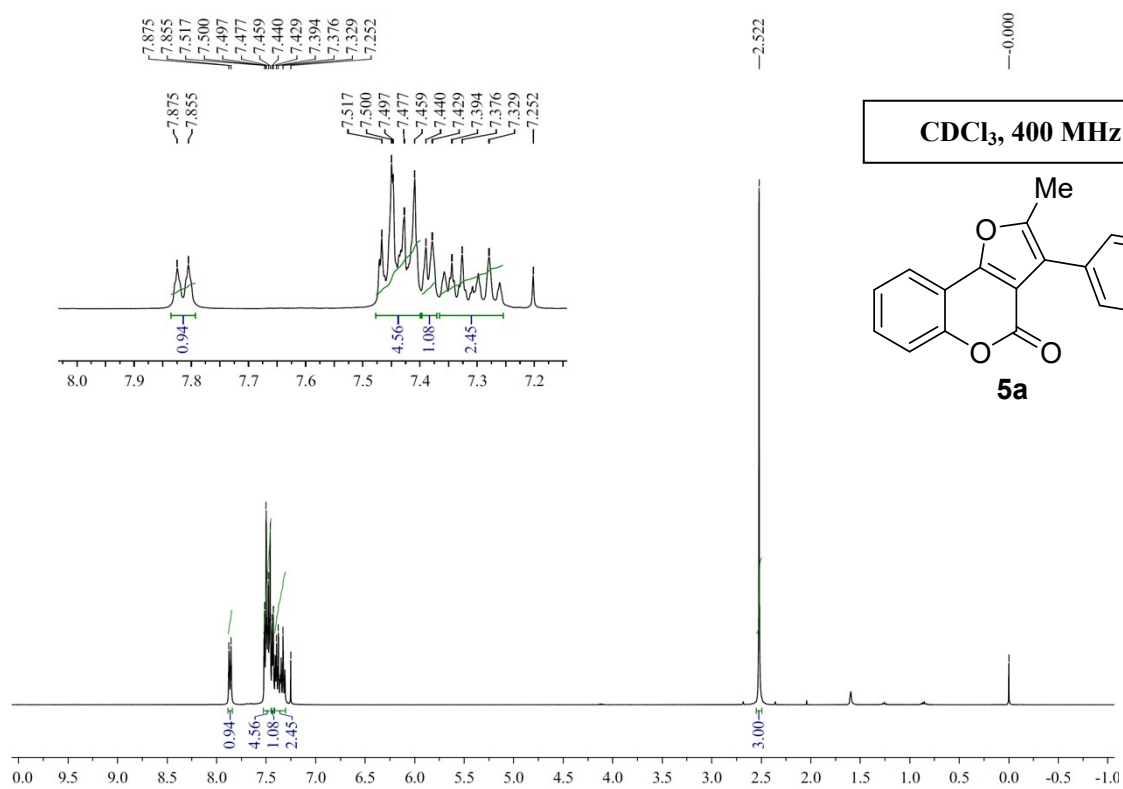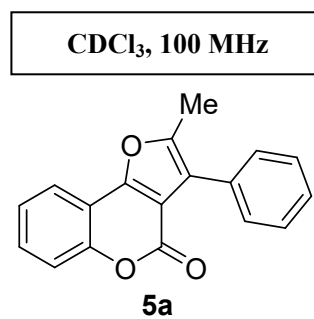

**2-Methyl-3-(p-tolyl)-4H-furo[3,2-c]chromen-4-one (Table 3, compound 5b)**

CDCl<sub>3</sub>, 400 MHz

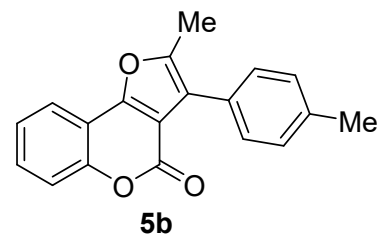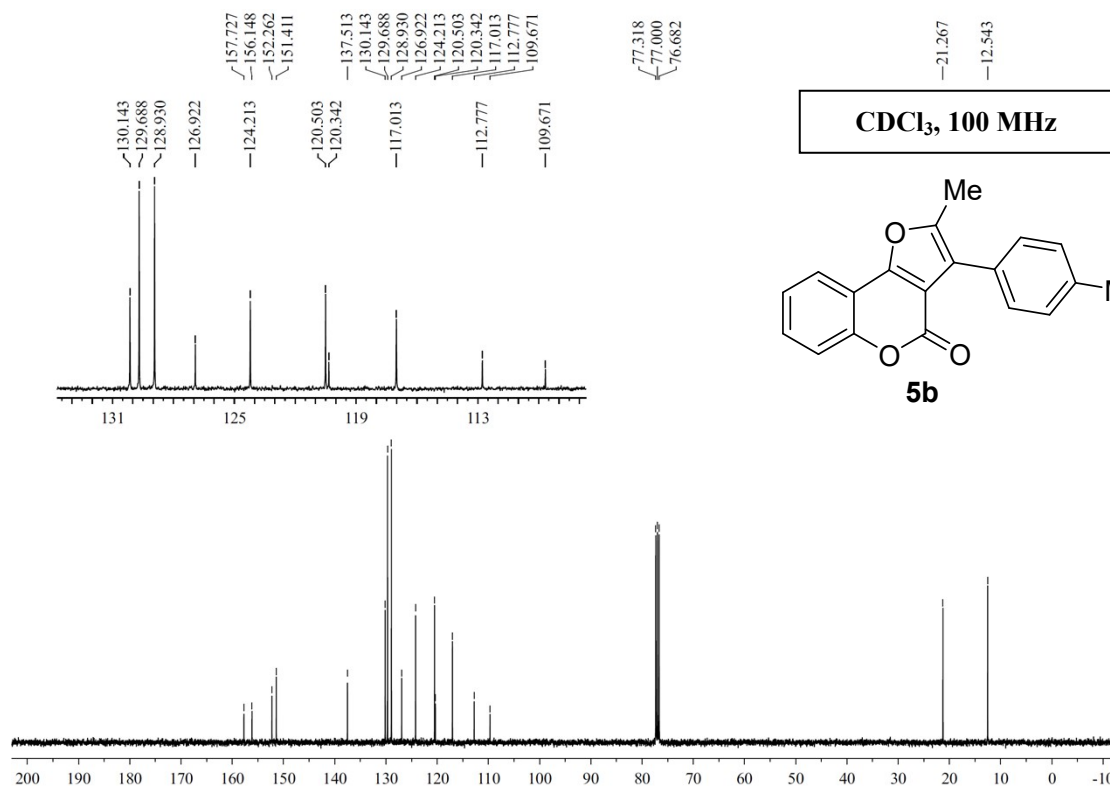

*3-(4-Methoxyphenyl)-2-methyl-4H-furo[3,2-c]chromen-4-one* (Table 3, compound 5c)

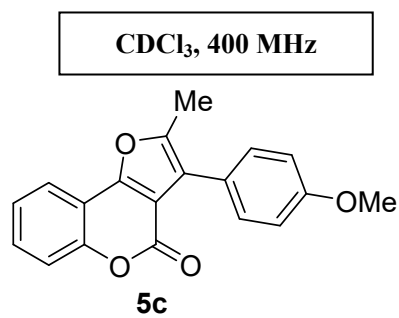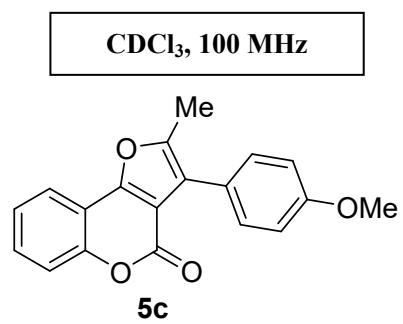

**3-(4-Fluorophenyl)-2-methyl-4H-furo[3,2-c]chromen-4-one (Table 3, compound 5d)**

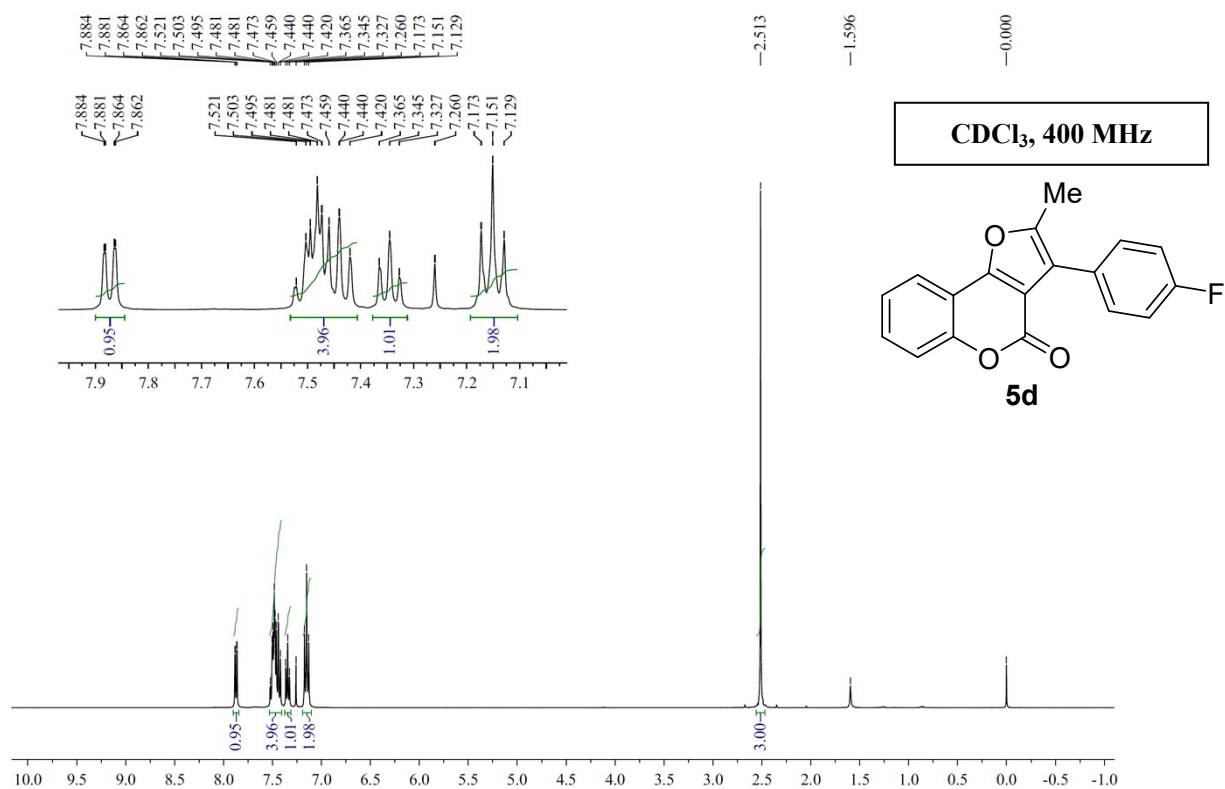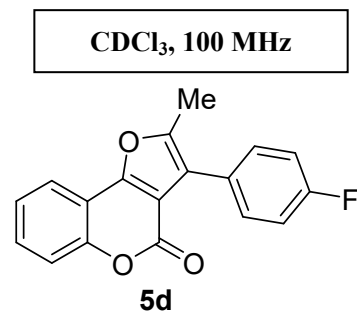

*3-(4-Chlorophenyl)-2-methyl-4H-furo[3,2-c]chromen-4-one* (Table 3, compound 5e)

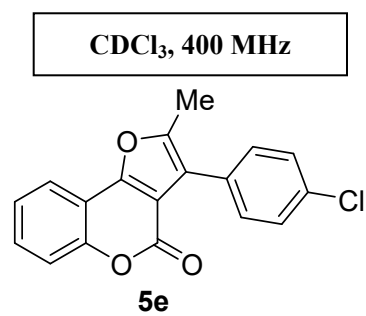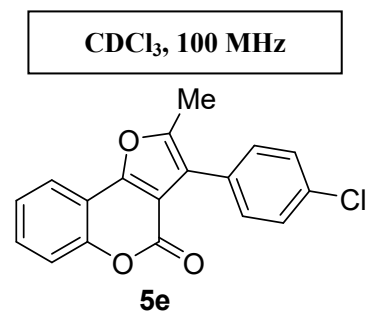

**3-(4-Bromophenyl)-2-methyl-4H-furo[3,2-c]chromen-4-one (Table 3, compound 5f)**

CDCl<sub>3</sub>, 400 MHz

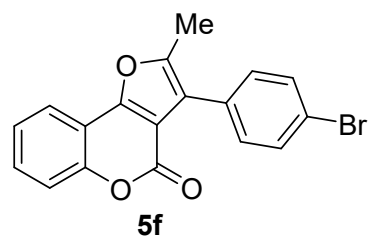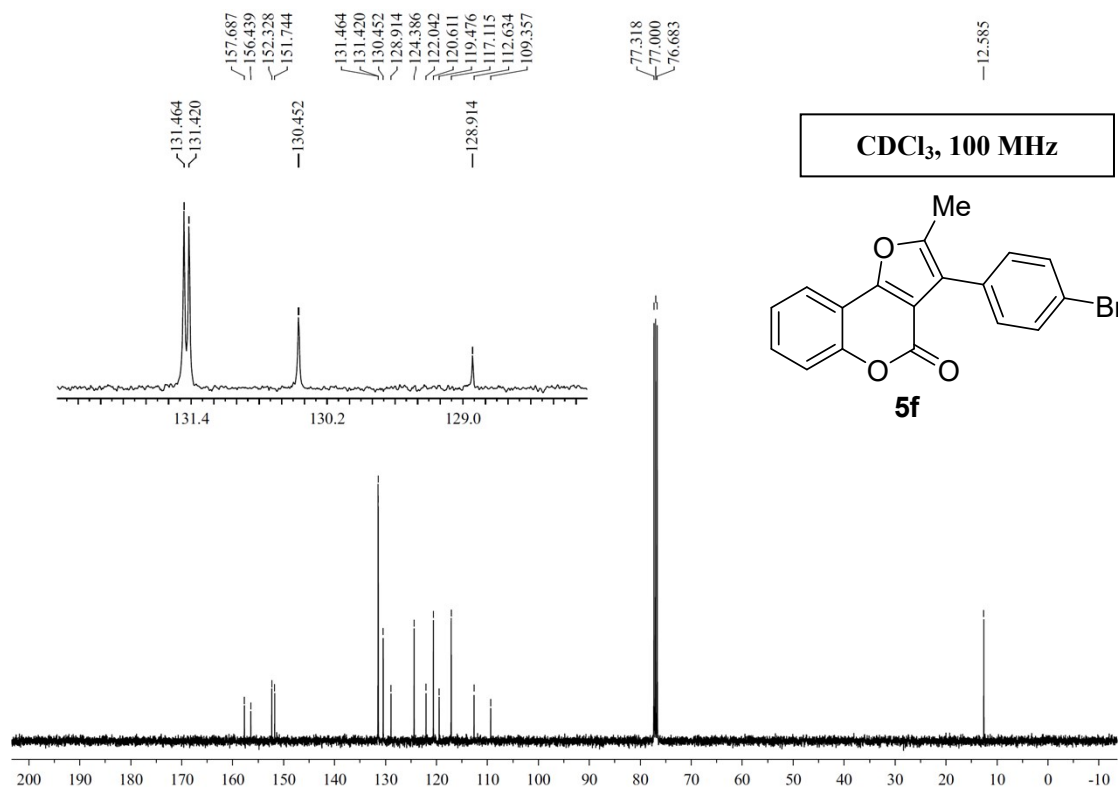

*3-(3-Chlorophenyl)-2-methyl-4H-furo[3,2-c]chromen-4-one* (Table 3, compound 5g)

CDCl<sub>3</sub>, 400 MHz

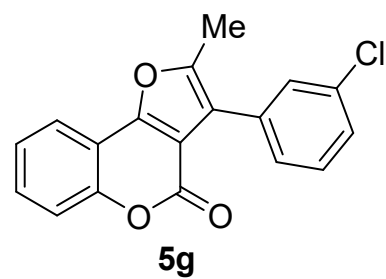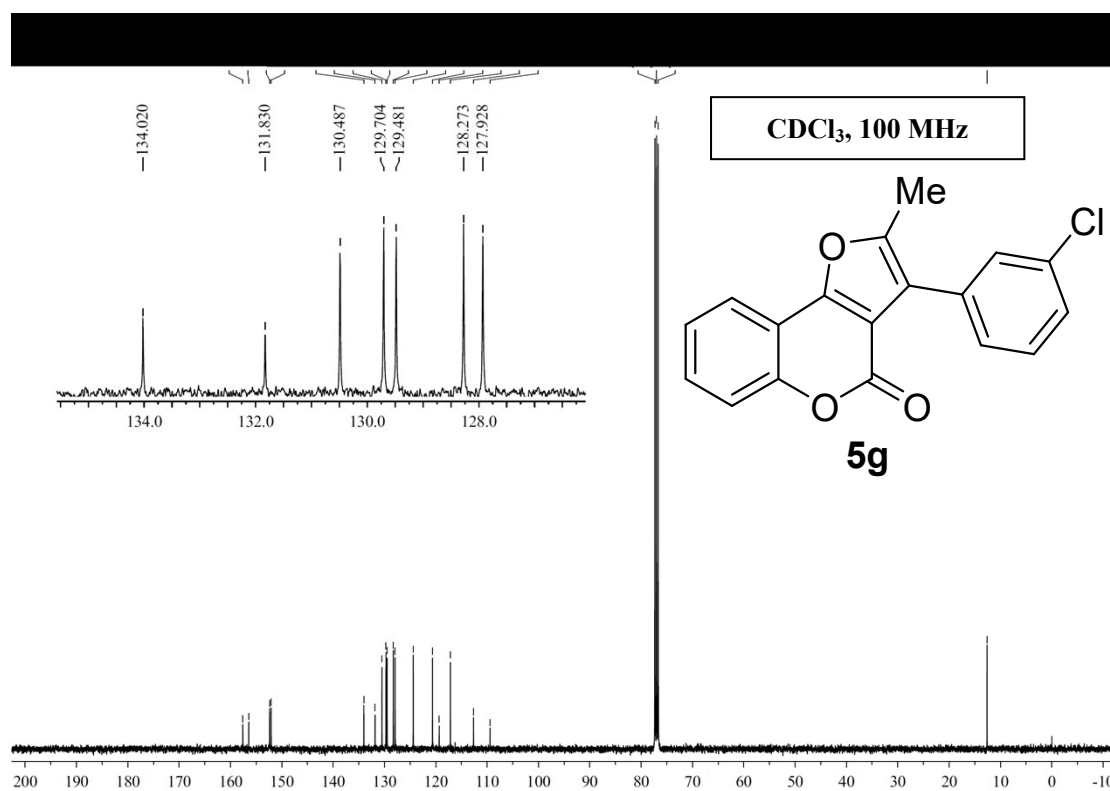

Supplement: d4ra03962a1.pdf [file d4ra03962a1.pdf]
